# Supplementary material for: Mendelian randomization highlights insomnia as a risk factor for pain diagnoses
Source: PubMed Central journal article supplement — Sleep. 2021 Feb 20;44(7):zsab025. doi: 10.1093/sleep/zsab025 (PMC8271146; doi:10.1093/sleep/zsab025), 2021-02-20
Supplement: zsab025_suppl_supplementary_materials.pdf [file zsab025_suppl_supplementary_materials.pdf]

## **Mendelian randomization highlights insomnia as a risk factor for pain diagnoses**

Martin Broberg<sup>1</sup>, Juha Karjalainen<sup>1,2,3</sup>, FinnGen<sup>a</sup>, Hanna M. Ollila<sup>1,3,4\*</sup>

<sup>1</sup>Institute for Molecular Medicine Finland, HiLIFE, University of Helsinki, Helsinki, Finland.

<sup>2</sup>Program in Medical and Population Genetics, Broad Institute, Cambridge, MA, USA.

<sup>3</sup>Center for Genomic Medicine, Massachusetts General Hospital, Boston, MA, USA.

<sup>4</sup>Department of Genetics, Stanford University, Palo Alto, CA, USA

<sup>a</sup>For specific list see Supplementary document 1.

\*corresponding author, email: [hanna.m.ollila@helsinki.fi](mailto:hanna.m.ollila@helsinki.fi)

## **Supplementary document 1**

### **FinnGen Data Freeze 5:**

#### **Contributors of FinnGen**

##### **Steering Committee**

Aarno Palotie Institute for Molecular Medicine Finland, HiLIFE, University of Helsinki,  
Finland

Mark Daly Institute for Molecular Medicine Finland, HiLIFE, University of Helsinki,  
Finland

##### **Pharmaceutical companies**

|                   |                                                     |
|-------------------|-----------------------------------------------------|
| Howard Jacob      | Abbvie, Chicago, IL, United States                  |
| Athena Matakidou  | Astra Zeneca, Cambridge, United Kingdom             |
| Heiko Runz        | Biogen, Cambridge, MA, United States                |
| Sally John        | Biogen, Cambridge, MA, United States                |
| Robert Plenge     | Celgene, Summit, NJ, United States                  |
| Mark McCarthy     | Genentech, San Francisco, CA, United States         |
| Julie Hunkapiller | Genentech, San Francisco, CA, United States         |
| Meg Ehm           | GlaxoSmithKline, Brentford, United Kingdom          |
| Dawn Waterworth   | GlaxoSmithKline, Brentford, United Kingdom          |
| Caroline Fox      | Merck, Kenilworth, NJ, United States                |
| Anders Malarstig  | Pfizer, New York, NY, United States                 |
| Kathy Klinger     | Sanofi, Paris, France                               |
| Kathy Call        | Sanofi, Paris, France                               |
| Tim Behrens       | Maze Therapeutics, San Francisco, CA, United States |

Patrick Loerch            Janssen Biotech, Beerse, Belgium

**University of Helsinki & Biobanks**

Tomi Mäkelä            HiLIFE, University of Helsinki, Finland, Finland

Jaakko Kaprio           Institute for Molecular Medicine Finland, HiLIFE, Helsinki, Finland,  
Finland

Petri Virolainen            Auria Biobank / University of Turku / Hospital District of  
Southwest Finland, Turku, Finland

Kari Pulkki            Auria Biobank / University of Turku / Hospital District of Southwest  
Finland, Turku, Finland

Terhi Kilpi            THL Biobank / The National Institute of Health and Welfare Helsinki,  
Finland

Markus Perola           THL Biobank / The National Institute of Health and Welfare Helsinki,  
Finland

Jukka Partanen            Finnish Red Cross Blood Service / Finnish Hematology  
Registry and Clinical Biobank, Helsinki, Finland

Anne Pitkäranta           Helsinki Biobank / Helsinki University and Hospital District of  
Helsinki and Uusimaa, Helsinki

Riitta Kaarteenaho      Northern Finland Biobank Borealis / University of Oulu / Northern  
Ostrobothnia Hospital District, Oulu, Finland

Seppo Vainio            Northern Finland Biobank Borealis / University of Oulu / Northern  
Ostrobothnia Hospital District, Oulu, Finland

Miia Turpeinen            Northern Finland Biobank Borealis / University of Oulu /  
Northern Ostrobothnia Hospital

Raisa Serpi            Northern Finland Biobank Borealis / University of Oulu / Northern  
Ostrobothnia Hospital

Tarja Laitinen Finnish Clinical Biobank Tampere / University of Tampere / Pirkanmaa  
Hospital District, Tampere, Finland

Johanna Mäkelä Finnish Clinical Biobank Tampere / University of Tampere /  
Pirkanmaa Hospital District, Tampere, Finland

Veli-Matti Kosma Biobank of Eastern Finland / University of Eastern Finland / Northern  
Savo Hospital District, Kuopio, Finland

Urho Kujala Central Finland Biobank / University of Jyväskylä / Central Finland  
Health Care District, Jyväskylä, Finland

### **Other Experts/ Non-Voting Members**

Outi Tuovila Business Finland, Helsinki, Finland

Minna Hendolin Business Finland, Helsinki, Finland

Raimo Pakkanen Business Finland, Helsinki, Finland

### **Scientific Committee**

#### **Pharmaceutical companies**

Jeff Waring Abbvie, Chicago, IL, United States

Bridget Riley-Gillis Abbvie, Chicago, IL, United States

Athena Matakidou Astra Zeneca, Cambridge, United Kingdom

Heiko Runz Biogen, Cambridge, MA, United States

Jimmy Liu Biogen, Cambridge, MA, United States

Shameek Biswas Celgene, Summit, NJ, United States

Julie Hunkapiller Genentech, San Francisco, CA, United States

Dawn Waterworth GlaxoSmithKline, Brentford, United Kingdom

Meg Ehm GlaxoSmithKline, Brentford, United Kingdom

Dorothee Diogo Merck, Kenilworth, NJ, United States  
Caroline Fox Merck, Kenilworth, NJ, United States  
Anders Malarstig Pfizer, New York, NY, United States  
Catherine Marshall Pfizer, New York, NY, United States  
Xinli Hu Pfizer, New York, NY, United States  
Kathy Call Sanofi, Paris, France  
Kathy Klinger Sanofi, Paris, France  
Matthias Gossel Sanofi, Paris, France  
Robert Graham Maze Therapeutics, San Francisco, CA, United States  
Tim Behrens Maze Therapeutics, San Francisco, CA, United States  
Beryl Cummings Maze Therapeutics, San Francisco, CA, United States  
Wilco Fleuren Janssen Biotech, Beerse, Belgium

### **University of Helsinki & Biobanks**

Samuli Ripatti Institute for Molecular Medicine Finland, HiLIFE, Helsinki, Finland  
Johanna Schleutker Auria Biobank / Univ. of Turku / Hospital District of Southwest  
Finland, Turku, Finland  
Markus Perola THL Biobank / The National Institute of Health and Welfare  
Helsinki, Finland  
Mikko Arvas Finnish Red Cross Blood Service / Finnish Hematology Registry and  
Clinical Biobank, Helsinki, Finland  
Olli Carpén Helsinki Biobank / Helsinki University and Hospital District of  
Helsinki and Uusimaa, Helsinki  
Reetta Hinttala Northern Finland Biobank Borealis / University of Oulu /  
Northern Ostrobothnia Hospital District, Oulu, Finland

Johannes Kettunen Northern Finland Biobank Borealis / University of Oulu / Northern Ostrobothnia Hospital District, Oulu, Finland

Johanna Mäkelä Finnish Clinical Biobank Tampere / University of Tampere / Pirkanmaa Hospital District, Tampere, Finland

Arto Mannermaa Biobank of Eastern Finland / University of Eastern Finland / Northern Savo Hospital District, Kuopio, Finland

Jari Laukkanen Central Finland Biobank / University of Jyväskylä / Central Finland Health Care District, Jyväskylä, Finland

Urho Kujala Central Finland Biobank / University of Jyväskylä / Central Finland Health Care District, Jyväskylä, Finland

### **Other Experts/ Non-Voting Members**

Outi Tuovila Business Finland, Helsinki, Finland

Minna Hendolin Business Finland, Helsinki, Finland

Raimo Pakkanen Business Finland, Helsinki, Finland

### **Clinical Groups**

#### **Neurology Group**

Hilkka Soininen Northern Savo Hospital District, Kuopio, Finland

Valtteri Julkunen Northern Savo Hospital District, Kuopio, Finland

Anne Remes Northern Ostrobothnia Hospital District, Oulu, Finland

Reetta Kälviäinen Northern Savo Hospital District, Kuopio, Finland

Mikko Hiltunen Northern Savo Hospital District, Kuopio, Finland

Jukka Peltola Pirkanmaa Hospital District, Tampere, Finland

Pentti Tienari Hospital District of Helsinki and Uusimaa, Helsinki, Finland

|                     |                                                        |
|---------------------|--------------------------------------------------------|
| Juha Rinne          | Hospital District of Southwest Finland, Turku, Finland |
| Adam Ziemann        | Abbvie, Chicago, IL, United States                     |
| Jeffrey Waring      | Abbvie, Chicago, IL, United States                     |
| Sahar Esmaeeli      | Abbvie, Chicago, IL, United States                     |
| Nizar Smaoui        | Abbvie, Chicago, IL, United States                     |
| Anne Lehtonen       | Abbvie, Chicago, IL, United States                     |
| Susan Eaton         | Biogen, Cambridge, MA, United States                   |
| Heiko Runz          | Biogen, Cambridge, MA, United States                   |
| Sanni Lahdenperä    | Biogen, Cambridge, MA, United States                   |
| Janet van Adelsberg | Celgene, Summit, NJ, United States                     |
| Shameek Biswas      | Celgene, Summit, NJ, United States                     |
| John Michon         | Genentech, San Francisco, CA, United States            |
| Geoff Kerchner      | Genentech, San Francisco, CA, United States            |
| Julie Hunkapiller   | Genentech, San Francisco, CA, United States            |
| Natalie Bowers      | Genentech, San Francisco, CA, United States            |
| Edmond Teng         | Genentech, San Francisco, CA, United States            |
| John Eicher         | Merck, Kenilworth, NJ, United States                   |
| Vinay Mehta         | Merck, Kenilworth, NJ, United States                   |
| Padhraig Gormley    | Merck, Kenilworth, NJ, United States                   |
| Kari Linden         | Pfizer, New York, NY, United States                    |
| Christopher Whelan  | Pfizer, New York, NY, United States                    |
| Fanli Xu            | GlaxoSmithKline, Brentford, United Kingdom             |
| David Pulford       | GlaxoSmithKline, Brentford, United Kingdom             |

**Gastroenterology Group**

Martti Färkkilä Hospital District of Helsinki and Uusimaa, Helsinki, Finland

Sampsa Pikkarainen Hospital District of Helsinki and Uusimaa, Helsinki, Finland

Airi Jussila Pirkanmaa Hospital District, Tampere, Finland

Timo Blomster Northern Ostrobothnia Hospital District, Oulu, Finland

Mikko Kiviniemi Northern Savo Hospital District, Kuopio, Finland

Markku Voutilainen Hospital District of Southwest Finland, Turku, Finland

Bob Georgantas Abbvie, Chicago, IL, United States

Graham Heap Abbvie, Chicago, IL, United States

Jeffrey Waring Abbvie, Chicago, IL, United States

Nizar Smaoui Abbvie, Chicago, IL, United States

Fedik Rahimov Abbvie, Chicago, IL, United States

Anne Lehtonen Abbvie, Chicago, IL, United States

Keith Usiskin Celgene, Summit, NJ, United States

Tim Lu Genentech, San Francisco, CA, United States

Natalie Bowers Genentech, San Francisco, CA, United States

Danny Oh Genentech, San Francisco, CA, United States

John Michon Genentech, San Francisco, CA, United States

Vinay Mehta Merck, Kenilworth, NJ, United States

Kirsi Kalpala Pfizer, New York, NY, United States

Melissa Miller Pfizer, New York, NY, United States

Xinli Hu Pfizer, New York, NY, United States

Linda McCarthy GlaxoSmithKline, Brentford, United Kingdom

### **Rheumatology Group**

Kari Eklund Hospital District of Helsinki and Uusimaa, Helsinki, Finland



Antti Palomäki Hospital District of Southwest Finland, Turku, Finland

Pia Isomäki Pirkanmaa Hospital District, Tampere, Finland

Laura Pirilä Hospital District of Southwest Finland, Turku, Finland

Oili Kaipainen-Seppänen Northern Savo Hospital District, Kuopio, Finland

Johanna Huhtakangas Northern Ostrobothnia Hospital District, Oulu, Finland

Bob Georgantas Abbvie, Chicago, IL, United States

Jeffrey Waring Abbvie, Chicago, IL, United States

Fedik Rahimov Abbvie, Chicago, IL, United States

Apinya Lertratanakul Abbvie, Chicago, IL, United States

Nizar Smaoui Abbvie, Chicago, IL, United States

Anne Lehtonen Abbvie, Chicago, IL, United States

David Close Astra Zeneca, Cambridge, United Kingdom

Marla Hochfeld Celgene, Summit, NJ, United States

Natalie Bowers Genentech, San Francisco, CA, United States

John Michon Genentech, San Francisco, CA, United States

Dorothee Diogo Merck, Kenilworth, NJ, United States

Vinay Mehta Merck, Kenilworth, NJ, United States

Kirsi Kalpala Pfizer, New York, NY, United States

Nan Bing Pfizer, New York, NY, United States

Xinli Hu Pfizer, New York, NY, United States

Jorge Esparza Gordillo GlaxoSmithKline, Brentford, United Kingdom

Nina Mars Institute for Molecular Medicine Finland, HiLIFE, Helsinki, Finland

### **Pulmonology Group**

Tarja Laitinen Pirkanmaa Hospital District, Tampere, Finland

Margit Pelkonen Northern Savo Hospital District, Kuopio, Finland  
Paula Kauppi Hospital District of Helsinki and Uusimaa, Helsinki, Finland  
Hannu Kankaanranta Pirkanmaa Hospital District, Tampere, Finland  
Terttu Harju Northern Ostrobothnia Hospital District, Oulu, Finland  
Nizar Smaoui Abbvie, Chicago, IL, United States  
David Close Astra Zeneca, Cambridge, United Kingdom  
Susan Eaton Biogen, Cambridge, MA, United States  
Steven Greenberg Celgene, Summit, NJ, United States  
Hubert Chen Genentech, San Francisco, CA, United States  
Natalie Bowers Genentech, San Francisco, CA, United States  
John Michon Genentech, San Francisco, CA, United States  
Vinay Mehta Merck, Kenilworth, NJ, United States  
Jo Betts GlaxoSmithKline, Brentford, United Kingdom  
Soumitra Ghosh GlaxoSmithKline, Brentford, United Kingdom

### **Cardiometabolic Diseases Group**

Veikko Salomaa The National Institute of Health and Welfare Helsinki, Finland  
Teemu Niiranen The National Institute of Health and Welfare Helsinki, Finland  
Markus Juonala Hospital District of Southwest Finland, Turku, Finland  
Kaj Metsärinne Hospital District of Southwest Finland, Turku, Finland  
Mika Kähönen Pirkanmaa Hospital District, Tampere, Finland  
Juhani Junttila Northern Ostrobothnia Hospital District, Oulu, Finland  
Markku Laakso Northern Savo Hospital District, Kuopio, Finland  
Jussi Pihlajamäki Northern Savo Hospital District, Kuopio, Finland  
Juha Sinisalo Hospital District of Helsinki and Uusimaa, Helsinki, Finland

Marja-Riitta Taskinen Hospital District of Helsinki and Uusimaa, Helsinki, Finland

Tiinamaija Tuomi Hospital District of Helsinki and Uusimaa, Helsinki, Finland

Jari Laukkanen Central Finland Health Care District, Jyväskylä, Finland

Ben Challis Astra Zeneca, Cambridge, United Kingdom

Andrew Peterson Genentech, San Francisco, CA, United States

Julie Hunkapiller Genentech, San Francisco, CA, United States

Natalie Bowers Genentech, San Francisco, CA, United States

John Michon Genentech, San Francisco, CA, United States

Dorothee Diogo Merck, Kenilworth, NJ, United States

Audrey Chu Merck, Kenilworth, NJ, United States

Vinay Mehta Merck, Kenilworth, NJ, United States

Jaakko Parkkinen . Pfizer, New York, NY, United States

Melissa Miller Pfizer, New York, NY, United States

Anthony Muslin Sanofi, Paris, France

Dawn Waterworth GlaxoSmithKline, Brentford, United Kingdom

### **Oncology Group**

Heikki Joensuu Hospital District of Helsinki and Uusimaa, Helsinki, Finland

Olli Carpén Hospital District of Helsinki and Uusimaa, Helsinki, Finland

Tuomo Meretoja Hospital District of Helsinki and Uusimaa, Helsinki, Finland

Lauri Aaltonen Hospital District of Helsinki and Uusimaa, Helsinki, Finland

Johanna Mattson Hospital District of Helsinki and Uusimaa, Helsinki, Finland

Johanna Schleutker University of Turku, Turku, Finland

Annika Auranen Pirkanmaa Hospital District , Tampere, Finland

|                      |                                                        |
|----------------------|--------------------------------------------------------|
| Peeter Karihtala     | Northern Ostrobothnia Hospital District, Oulu, Finland |
| Saila Kauppila       | Northern Ostrobothnia Hospital District, Oulu, Finland |
| Päivi Auvinen        | Northern Savo Hospital District, Kuopio, Finland       |
| Klaus Elenius        | Hospital District of Southwest Finland, Turku, Finland |
| Relja Popovic        | Abbvie, Chicago, IL, United States                     |
| Jeffrey Waring       | Abbvie, Chicago, IL, United States                     |
| Bridget Riley-Gillis | Abbvie, Chicago, IL, United States                     |
| Anne Lehtonen        | Abbvie, Chicago, IL, United States                     |
| Athena Matakidou     | Astra Zeneca, Cambridge, United Kingdom                |
| Jennifer Schutzman   | Genentech, San Francisco, CA, United States            |
| Julie Hunkapiller    | Genentech, San Francisco, CA, United States            |
| Natalie Bowers       | Genentech, San Francisco, CA, United States            |
| John Michon          | Genentech, San Francisco, CA, United States            |
| Vinay Mehta          | Merck, Kenilworth, NJ, United States                   |
| Andrey Loboda        | Merck, Kenilworth, NJ, United States                   |
| Aparna Chhibber      | Merck, Kenilworth, NJ, United States                   |
| Heli Lehtonen        | Pfizer, New York, NY, United States                    |
| Stefan McDonough     | Pfizer, New York, NY, United States                    |
| Marika Crohns        | Sanofi, Paris, France                                  |
| Diptee Kulkarni      | GlaxoSmithKline, Brentford, United Kingdom             |

### **Ophthalmology Group**

|                 |                                                              |
|-----------------|--------------------------------------------------------------|
| Kai Kaarniranta | Northern Savo Hospital District, Kuopio, Finland             |
| Joni A Turunen  | Hospital District of Helsinki and Uusimaa, Helsinki, Finland |
| Terhi Ollila    | Hospital District of Helsinki and Uusimaa, Helsinki, Finland |

Sanna Seitsonen Hospital District of Helsinki and Uusimaa, Helsinki, Finland  
Hannu Uusitalo Pirkanmaa Hospital District, Tampere, Finland  
Vesa Aaltonen Hospital District of Southwest Finland, Turku, Finland  
Hannele Uusitalo-Järvinen Pirkanmaa Hospital District, Tampere, Finland  
Marja Luodonpää Northern Ostrobothnia Hospital District, Oulu, Finland  
Nina Hautala Northern Ostrobothnia Hospital District, Oulu, Finland  
Heiko Runz Biogen, Cambridge, MA, United States  
Stephanie Loomis Biogen, Cambridge, MA, United States  
Erich Strauss Genentech, San Francisco, CA, United States  
Natalie Bowers Genentech, San Francisco, CA, United States  
Hao Chen Genentech, San Francisco, CA, United States  
John Michon Genentech, San Francisco, CA, United States  
Anna Podgornaia Merck, Kenilworth, NJ, United States  
Vinay Mehta Merck, Kenilworth, NJ, United States  
Dorothee Diogo Merck, Kenilworth, NJ, United States  
Joshua Hoffman GlaxoSmithKline, Brentford, United Kingdom

### **Dermatology Group**

Kaisa Tasanen Northern Ostrobothnia Hospital District, Oulu, Finland  
Laura Huilaja Northern Ostrobothnia Hospital District, Oulu, Finland  
Katariina Hannula-Jouppi Hospital District of Helsinki and Uusimaa, Helsinki, Finland  
Teea Salmi Pirkanmaa Hospital District, Tampere, Finland  
Sirrku Peltonen Hospital District of Southwest Finland, Turku, Finland  
Leena Koulu Hospital District of Southwest Finland, Turku, Finland  
Ilkka Harvima Northern Savo Hospital District, Kuopio, Finland

Kirsi Kalpala Pfizer, New York, NY, United States  
Ying Wu Pfizer, New York, NY, United States  
David Choy Genentech, San Francisco, CA, United States  
John Michon Genentech, San Francisco, CA, United States  
Nizar Smaoui Abbvie, Chicago, IL, United States  
Fedik Rahimov Abbvie, Chicago, IL, United States  
Anne Lehtonen Abbvie, Chicago, IL, United States  
Dawn Waterworth GlaxoSmithKline, Brentford, United Kingdom

### **Odontology Group**

Pirkko Pussinen Hospital District of Helsinki and Uusimaa, Helsinki, Finland  
Aino Salminen Hospital District of Helsinki and Uusimaa, Helsinki, Finland  
Tuula Salo Hospital District of Helsinki and Uusimaa, Helsinki, Finland  
David Rice Hospital District of Helsinki and Uusimaa, Helsinki, Finland  
Pekka Nieminen Hospital District of Helsinki and Uusimaa, Helsinki, Finland  
Ulla Palotie Hospital District of Helsinki and Uusimaa, Helsinki, Finland  
Maria Siponen Northern Savo Hospital District, Kuopio, Finland  
Liisa Suominen Northern Savo Hospital District, Kuopio, Finland  
Päivi Mäntylä Northern Savo Hospital District, Kuopio, Finland  
Ulvi Gursoy Hospital District of Southwest Finland, Turku, Finland  
Vuokko Anttonen Northern Ostrobothnia Hospital District, Oulu, Finland  
Kirsi Sipilä Northern Ostrobothnia Hospital District, Oulu, Finland

### **FinnGen Analysis working group**

Justin Wade Davis Abbvie, Chicago, IL, United States  
Bridget Riley-Gillis Abbvie, Chicago, IL, United States  
Danjuma Quarless Abbvie, Chicago, IL, United States

|                                |                                             |
|--------------------------------|---------------------------------------------|
| Fedik Rahimov                  | Abbvie, Chicago, IL, United States          |
| Sahar Esmaeeli                 | Abbvie, Chicago, IL, United States          |
| Slavé Petrovski                | Astra Zeneca, Cambridge, United Kingdom     |
| Eleonor Wigmore                | Astra Zeneca, Cambridge, United Kingdom     |
| Jimmy Liu                      | Biogen, Cambridge, MA, United States        |
| Chia-Yen Chen                  | Biogen, Cambridge, MA, United States        |
| Paola Bronson                  | Biogen, Cambridge, MA, United States        |
| Ellen Tsai                     | Biogen, Cambridge, MA, United States        |
| Stephanie Loomis               | Biogen, Cambridge, MA, United States        |
| Yunfeng Huang                  | Biogen, Cambridge, MA, United States        |
| Joseph Maranville              | Celgene, Summit, NJ, United States          |
| Shameek Biswas                 | Celgene, Summit, NJ, United States          |
| Elmutaz Shaikho Elhaj Mohammed | Celgene, Summit, NJ, United States          |
| Samir Wadhawan                 | Bristol-Meyers-Squibb                       |
| Erika Kvikstad                 | Bristol-Meyers-Squibb                       |
| Minal Caliskan                 | Bristol-Meyers-Squibb                       |
| Diana Chang                    | Genentech, San Francisco, CA, United States |
| Julie Hunkapiller              | Genentech, San Francisco, CA, United States |
| Tushar Bhangale                | Genentech, San Francisco, CA, United States |
| Natalie Bowers                 | Genentech, San Francisco, CA, United States |
| Sarah Pendergrass              | Genentech, San Francisco, CA, United States |
| Dorothee Diogo                 | Merck, Kenilworth, NJ, United States        |
| Emily Holzinger                | Merck, Kenilworth, NJ, United States        |
| Padhraig Gormley               | Merck, Kenilworth, NJ, United States        |
| Xing Chen                      | Pfizer, New York, NY, United States         |

|                   |                                                                                                                                   |
|-------------------|-----------------------------------------------------------------------------------------------------------------------------------|
| Åsa Hedman        | Pfizer, New York, NY, United States                                                                                               |
| Karen S King      | GlaxoSmithKline, Brentford, United Kingdom                                                                                        |
| Clarence Wang     | Sanofi, Paris, France                                                                                                             |
| Ethan Xu          | Sanofi, Paris, France                                                                                                             |
| Franck Auge       | Sanofi, Paris, France                                                                                                             |
| Clement Chatelain | Sanofi, Paris, France                                                                                                             |
| Deepak Rajpal     | Sanofi, Paris, France                                                                                                             |
| Dongyu Liu        | Sanofi, Paris, France                                                                                                             |
| Katherine Call    | Sanofi, Paris, France                                                                                                             |
| Tai-he Xia        | Sanofi, Paris, France                                                                                                             |
| Beryl Cummings    | Maze Therapeutics, San Francisco, CA, United States                                                                               |
| Matt Brauer       | Maze Therapeutics, San Francisco, CA, United States                                                                               |
| Mitja Kurki       | Institute for Molecular Medicine Finland, HiLIFE, University of Helsinki, Finland / Broad Institute, Cambridge, MA, United States |
| Samuli Ripatti    | Institute for Molecular Medicine Finland, HiLIFE, University of Helsinki, Finland                                                 |
| Mark Daly         | Institute for Molecular Medicine Finland, HiLIFE, University of Helsinki, Finland                                                 |
| Juha Karjalainen  | Institute for Molecular Medicine Finland, HiLIFE, University of Helsinki, Finland / Broad Institute, Cambridge, MA, United States |
| Aki Havulinna     | Institute for Molecular Medicine Finland, HiLIFE, University of Helsinki, Finland                                                 |
| Anu Jalanko       | Institute for Molecular Medicine Finland, HiLIFE, University of Helsinki, Finland                                                 |



Priit Palta Institute for Molecular Medicine Finland, HiLIFE, University of Helsinki, Finland

Pietro della Briotta Parolo Institute for Molecular Medicine Finland, HiLIFE, University of Helsinki, Finland

Wei Zhou Broad Institute, Cambridge, MA, United States

Susanna Lemmelä Institute for Molecular Medicine Finland, HiLIFE, University of Helsinki, Finland

Manuel Rivas University of Stanford, Stanford, CA, United States

Jarmo Harju Institute for Molecular Medicine Finland, HiLIFE, University of Helsinki, Finland

Aarno Palotie Institute for Molecular Medicine Finland, HiLIFE, University of Helsinki, Finland

Arto Lehisto Institute for Molecular Medicine Finland, HiLIFE, University of Helsinki, Finland

Andrea Ganna Institute for Molecular Medicine Finland, HiLIFE, University of Helsinki, Finland

Vincent Llorens Institute for Molecular Medicine Finland, HiLIFE, University of Helsinki, Finland

Hannele Laivuori Institute for Molecular Medicine Finland, HiLIFE, University of Helsinki, Finland

Sina Rüeger Institute for Molecular Medicine Finland, HiLIFE, University of Helsinki, Finland

Mari E Niemi Institute for Molecular Medicine Finland, HiLIFE, University of Helsinki, Finland

Taru Tukiainen Institute for Molecular Medicine Finland, HiLIFE, University of Helsinki, Finland

Mary Pat Reeve Institute for Molecular Medicine Finland, HiLIFE, University of Helsinki, Finland

Henrike Heyne Institute for Molecular Medicine Finland, HiLIFE, University of Helsinki, Finland

Nina Mars Institute for Molecular Medicine Finland, HiLIFE, University of Helsinki, Finland

Kimmo Palin University of Helsinki, Helsinki, Finland

Javier Garcia-Tabuenca University of Tampere, Tampere, Finland

Harri Siirtola University of Tampere, Tampere, Finland

Tuomo Kiiskinen Institute for Molecular Medicine Finland, HiLIFE, University of Helsinki, Finland

Jiwoo Lee Institute for Molecular Medicine Finland, HiLIFE, University of Helsinki, Finland / Broad Institute, Cambridge, MA, United States

Kristin Tsuo Institute for Molecular Medicine Finland, HiLIFE, University of Helsinki, Finland / Broad Institute, Cambridge, MA, United States

Amanda Elliott Institute for Molecular Medicine Finland, HiLIFE, University of Helsinki, Finland / Broad Institute, Cambridge, MA, United States

Kati Kristiansson THL Biobank / The National Institute of Health and Welfare Helsinki, Finland

Mikko Arvas Finnish Red Cross Blood Service, Helsinki, Finland

Kati Hyvärinen Finnish Red Cross Blood Service, Helsinki, Finland

Jarmo Ritari Finnish Red Cross Blood Service, Helsinki, Finland

Miika Koskinen Helsinki Biobank / Helsinki University and Hospital District of Helsinki and Uusimaa, Helsinki

Olli Carpén Helsinki Biobank / Helsinki University and Hospital District of Helsinki and Uusimaa, Helsinki

Johannes Kettunen Northern Finland Biobank Borealis / University of Oulu / Northern Ostrobothnia Hospital District, Oulu, Finland

Katri Pylkäs Northern Finland Biobank Borealis / University of Oulu / Northern Ostrobothnia Hospital District, Oulu, Finland

Marita Kalaoja Northern Finland Biobank Borealis / University of Oulu / Northern Ostrobothnia Hospital District, Oulu, Finland

Minna Karjalainen Northern Finland Biobank Borealis / University of Oulu / Northern Ostrobothnia Hospital District, Oulu, Finland

Tuomo Mantere Northern Finland Biobank Borealis / University of Oulu / Northern Ostrobothnia Hospital District, Oulu, Finland

Eeva Kangasniemi Finnish Clinical Biobank Tampere / University of Tampere / Pirkanmaa Hospital District, Tampere, Finland

Sami Heikkinen Biobank of Eastern Finland / University of Eastern Finland / Northern Savo Hospital District, Kuopio, Finland

Arto Mannermaa Biobank of Eastern Finland / University of Eastern Finland / Northern Savo Hospital District, Kuopio, Finland

Eija Laakkonen Central Finland Biobank / University of Jyväskylä / Central Finland Health Care District, Jyväskylä, Finland

Csilla Sipeky University of Turku, Turku, Finland

Samuel Heron University of Turku, Turku, Finland

Antti Karlsson                      Auria Biobank / University of Turku / Hospital District of  
Southwest Finland, Turku, Finland

Dhanaprakash Jambulingam    University of Turku, Turku, Finland

Venkat Subramaniam Rathinakannan University of Turku, Turku, Finland

### **Biobank directors**

Lila Kallio                      Auria Biobank / University of Turku / Hospital District of Southwest  
Finland, Turku, Finland

Sirpa Soini                      THL Biobank / The National Institute of Health and Welfare Helsinki,  
Finland

Jukka Partanen                      Finnish Red Cross Blood Service / Finnish Hematology  
Registry and Clinical Biobank, Helsinki, Finland

Eero Punkka                      Helsinki Biobank / Helsinki University and Hospital District of  
Helsinki and Uusimaa, Helsinki

Raisa Serpi                      Northern Finland Biobank Borealis / University of Oulu / Northern  
Ostrobothnia Hospital District, Oulu, Finland

Johanna Mäkelä                      Finnish Clinical Biobank Tampere / University of Tampere /  
Pirkanmaa Hospital District, Tampere, Finland

Veli-Matti Kosma                      Biobank of Eastern Finland / University of Eastern Finland / Northern  
Savo Hospital District, Kuopio, Finland

Teijo Kuopio                      Central Finland Biobank / University of Jyväskylä / Central Finland  
Health Care District, Jyväskylä, Finland

### **FinnGen Teams**

#### **Administration**

Anu Jalanko Institute for Molecular Medicine Finland, HiLIFE, University of Helsinki, Finland

Risto Kajanne Institute for Molecular Medicine Finland, HiLIFE, University of Helsinki, Finland

Mervi Aavikko Institute for Molecular Medicine Finland, HiLIFE, University of Helsinki, Finland

Manuel González Jiménez Institute for Molecular Medicine Finland, HiLIFE, University of Helsinki, Finland

### **Analysis**

Mitja Kurki Institute for Molecular Medicine Finland, HiLIFE, University of Helsinki, Finland / Broad Institute, Cambridge, MA, United States

Juha Karjalainen Institute for Molecular Medicine Finland, HiLIFE, University of Helsinki, Finland / Broad Institute, Cambridge, MA, United States

Pietro della Briotta Parola Institute for Molecular Medicine Finland, HiLIFE, University of Helsinki, Finland

Sina Rüeger Institute for Molecular Medicine Finland, HiLIFE, University of Helsinki, Finland

Arto Lehistö Institute for Molecular Medicine Finland, HiLIFE, University of Helsinki, Finland

Wei Zhou Broad Institute, Cambridge, MA, United States

Masahiro Kanai Broad Institute, Cambridge, MA, United States

### **Clinical Endpoint Development**

Hannele Laivuori Institute for Molecular Medicine Finland, HiLIFE, University of Helsinki, Finland

Aki Havulinna Institute for Molecular Medicine Finland, HiLIFE, University of Helsinki, Finland

Susanna Lemmelä Institute for Molecular Medicine Finland, HiLIFE, University of Helsinki, Finland

Tuomo Kiiskinen Institute for Molecular Medicine Finland, HiLIFE, University of Helsinki, Finland

### **Communication**

Mari Kaunisto Institute for Molecular Medicine Finland, HiLIFE, University of Helsinki, Finland

### **Data Management and IT Infrastructure**

Jarmo Harju Institute for Molecular Medicine Finland, HiLIFE, University of Helsinki, Finland

Elina Kilpeläinen Institute for Molecular Medicine Finland, HiLIFE, University of Helsinki, Finland

Timo P. Sipilä Institute for Molecular Medicine Finland, HiLIFE, University of Helsinki, Finland

Georg Brein Institute for Molecular Medicine Finland, HiLIFE, University of Helsinki, Finland  
Oluwaseun A. Dada Institute for Molecular Medicine Finland, HiLIFE, University of Helsinki, Finland

Ghazal Awaisa Institute for Molecular Medicine Finland, HiLIFE, University of Helsinki, Finland

Anastasia Shcherban Institute for Molecular Medicine Finland, HiLIFE, University of Helsinki, Finland

### **Genotyping**

Kati Donner Institute for Molecular Medicine Finland, HiLIFE, University of Helsinki, Finland

Timo P. Sipilä Institute for Molecular Medicine Finland, HiLIFE, University of Helsinki, Finland

### **Sample Collection Coordination**

Anu Loukola Helsinki Biobank / Helsinki University and Hospital District of Helsinki and Uusimaa, Helsinki

### **Sample Logistics**

Päivi Laiho THL Biobank / The National Institute of Health and Welfare Helsinki, Finland

Tuuli Sistonen THL Biobank / The National Institute of Health and Welfare Helsinki, Finland

Essi Kaiharju THL Biobank / The National Institute of Health and Welfare Helsinki, Finland

Markku Laukkanen THL Biobank / The National Institute of Health and Welfare Helsinki, Finland

Elina Järvensivu THL Biobank / The National Institute of Health and Welfare Helsinki, Finland

Sini Lähteenmäki THL Biobank / The National Institute of Health and Welfare Helsinki, Finland

Lotta Männikkö THL Biobank / The National Institute of Health and Welfare Helsinki, Finland

Regis Wong THL Biobank / The National Institute of Health and Welfare Helsinki, Finland

### **Registry Data Operations**

Hannele Mattsson THL Biobank / The National Institute of Health and Welfare Helsinki,  
Finland

Kati Kristiansson THL Biobank / The National Institute of Health and Welfare Helsinki,  
Finland

Susanna Lemmelä Institute for Molecular Medicine Finland, HiLIFE, University of  
Helsinki, Finland

Tero Hiekkalinna THL Biobank / The National Institute of Health and Welfare Helsinki,  
Finland

Teemu Paajanen THL Biobank / The National Institute of Health and Welfare  
Helsinki, Finland

### **Sequencing Informatics**

Priit Palta Institute for Molecular Medicine Finland, HiLIFE, University of  
Helsinki, Finland

Kalle Pärn Institute for Molecular Medicine Finland, HiLIFE, University of  
Helsinki, Finland

### **Trajectory Team**

Tarja Laitinen Pirkanmaa Hospital District, Tampere, Finland

Harri Siirtola University of Tampere, Tampere, Finland

Javier Gracia-Tabuenca University of Tampere, Tampere, Finland



**Supplementary Table S1****ICD10 Diagnosis codes included in Finngen R5 Pain summary statistics category**

| <b>Subcategories of general pain as given in text</b> | <b>ICD10</b> | <b>Long name</b>                                |
|-------------------------------------------------------|--------------|-------------------------------------------------|
| x                                                     | G50.0        | Trigeminal neuralgia                            |
| x                                                     | G50.1        | Atypical facial pain                            |
| Ocular pain                                           | H57.1        | Ocular Pain                                     |
| x                                                     | M54.0        | Panniculitis affecting regions of neck and back |
| x                                                     | M54.1        | Radiculopathy                                   |
| x                                                     | M54.2        | Cervicalgia                                     |
| Low back pain                                         | M54.5        | Low back pain                                   |
| x                                                     | M54.3        | Sciatica                                        |
| x                                                     | M54.4        | Lumbago with sciatica                           |
| x                                                     | M54.6        | Pain in thoracic spine                          |
| x                                                     | M54.8        | Other dorsalgia                                 |
| x                                                     | M54.9        | Dorsalgia, unspecified                          |
| x                                                     | M79.0        | Rheumatism, unspecified                         |
| x                                                     | M79.1        | Myalgia                                         |
| x                                                     | M79.2        | Neuralgia and neuritis, unspecified             |
| x                                                     | M79.3        | Panniculitis, unspecified                       |
| Pain in limb                                          | M79.6        | Pain in limb                                    |
| x                                                     | M79.7        | Fibromyalgia                                    |
| x                                                     | G54.6        | Phantom limb syndrome with pain                 |
| x                                                     | K07.6        | Temporomandibular joint disorders               |
| Pain in joint                                         | M25.5        | Pain in joint                                   |
| Pain in abdomen and pelvic area                       | R10          | Abdominal and pelvic pain                       |
| x                                                     | R51          | Headache                                        |
| x                                                     | R52          | Pain, not elsewhere classified                  |
| Pain in throat and chest                              | R07          | Pain in throat and chest                        |

Pain in throat and chest not included in general pain summary statistics

**Supplementary Table S2**

Sensitivity analysis results

**MR Egger intercept**

| outcome                        | exposure        | egger_intercept | se          | P-value  |
|--------------------------------|-----------------|-----------------|-------------|----------|
| Lane insomnia                  | Finngen R5 Pain | -0.001118827    | 0.002511883 | 0.674501 |
| Pain                           | Jansen insomnia | 0.00224489      | 0.002656084 | 0.398888 |
| Low back pain                  | Jansen insomnia | -0.003216347    | 0.00506841  | 0.526427 |
| Ocular pain                    | Jansen insomnia | 0.007294743     | 0.01506718  | 0.628813 |
| Joint pain                     | Jansen insomnia | -0.005641462    | 0.00471268  | 0.232699 |
| Limb pain                      | Jansen insomnia | -0.00434495     | 0.004699    | 0.356266 |
| Throat and chest pain          | Jansen insomnia | 0.009326415     | 0.003790137 | 0.014719 |
| Abdominal and pelvic area pain | Jansen insomnia | 0.003933862     | 0.003158162 | 0.214369 |

**MR PRESSO**

| outcome       | exposure        | Global test p-value |
|---------------|-----------------|---------------------|
| Lane insomnia | Finngen R5 Pain | 0.95                |

| Exposure        | Outcome         | MR Analysis       | Causal Estimate | Sd       | T-stat   | P-value  | Global test P-value |
|-----------------|-----------------|-------------------|-----------------|----------|----------|----------|---------------------|
| Jansen insomnia | Finngen R5 Pain | Raw               | 0.3876021       | 0.035258 | 10.99324 | 7.21E-23 | <2e-04              |
| Jansen insomnia | Finngen R5 Pain | Outlier-corrected | 0.3792089       | 0.034425 | 11.01563 | 6.38E-23 |                     |

| Exposure        | Outcome         | Distortion test p-value |
|-----------------|-----------------|-------------------------|
| Jansen insomnia | Finngen R5 Pain | 0.8174                  |
| Jansen insomnia | Finngen R5 Pain | x                       |

Lane insomnia=Data from Lane et al. (2019), doi: 10.1038/s41588-019-0361-7

Jansen insomnia=Data from Jansen et al. (2019), doi:10.1038/s41588-018-0333-3

**Supplementary Table S3**

Analysis based on using the multisite chronic pain (MCP) data from Johnston et al. 2019

doi:<https://doi.org/10.1371/journal.pgen.1008164>

| outcome                     | exposure | method          | nSNP | P-value  | OR [95% CI]      |
|-----------------------------|----------|-----------------|------|----------|------------------|
| Insomnia (Lane et al. 2019) | MCP      | MR Egger        | 64   | 9.37E-02 | 1.19 [0.97-1.44] |
| Insomnia (Lane et al. 2019) | MCP      | Weighted median | 64   | 1.03E-20 | 1.22 [1.17-1.28] |
| Insomnia (Lane et al. 2019) | MCP      | IVW             | 64   | 1.58E-36 | 1.32 [1.26-1.38] |

MR Egger intercept test for pleiotropy P-value: 0.28

MR Presso outlier corrected P-value: 1.59E-18

| outcome | exposure                      | method          | nSNP | P-value  | OR [95% CI]      |
|---------|-------------------------------|-----------------|------|----------|------------------|
| MCP     | Insomnia (Jansen et al. 2019) | MR Egger        | 232  | 2.94E-03 | 1.22 [1.07-1.38] |
| MCP     | Insomnia (Jansen et al. 2019) | Weighted median | 232  | 6.62E-26 | 1.23 [1.18-1.28] |
| MCP     | Insomnia (Jansen et al. 2019) | IVW             | 232  | 2.04E-81 | 1.36 [1.32-1.41] |

MR Egger intercept test for pleiotropy P-value: 0.07

MR Presso outlier corrected P-value: 4.23E-53

**Supplementary Table S4**

Lead variants used in this study.

| SNP ID      | Jansen et al. | Lane et al. | Johnston et al. | FinnGen Pain Proxy SNPs | Jansen et al. |
|-------------|---------------|-------------|-----------------|-------------------------|---------------|
|             | Table S6      | Table S2    | Table S7        |                         |               |
| rs1015438   | Yes           | x           | x               | x                       |               |
| rs1031654   | Yes           | Yes         | x               | x                       |               |
| rs1038093   | Yes           | x           | x               | x                       |               |
| rs10502966  | Yes           | x           | x               | x                       |               |
| rs1064213   | Yes           | x           | x               | x                       |               |
| rs1064939   | Yes           | x           | x               | x                       |               |
| rs10756571  | Yes           | x           | x               | x                       |               |
| rs10758593  | Yes           | x           | x               | x                       |               |
| rs10761240  | Yes           | x           | x               | x                       |               |
| rs10800992  | Yes           | x           | x               | x                       |               |
| rs10825503  | Yes           | x           | x               | x                       |               |
| rs10865954  | Yes           | Yes         | x               | x                       |               |
| rs10898940  | Yes           | x           | x               | x                       |               |
| rs10928256  | Yes           | x           | x               | x                       |               |
| rs10944696  | Yes           | x           | x               | x                       |               |
| rs10947428  | Yes           | x           | x               | x                       |               |
| rs10947690  | Yes           | Yes         | x               | x                       |               |
| rs10947987  | Yes           | x           | x               | x                       |               |
| rs10955647  | Yes           | x           | x               | x                       |               |
| rs11001276  | Yes           | x           | x               | x                       |               |
| rs11090039  | Yes           | x           | x               | x                       |               |
| rs11119409  | Yes           | x           | x               | x                       |               |
| rs11126082  | Yes           | x           | x               | x                       | rs4671158     |
| rs11149313  | Yes           | x           | x               | x                       |               |
| rs113851554 | Yes           | Yes         | x               | x                       |               |
| rs1147852   | Yes           | x           | x               | x                       |               |
| rs11588755  | Yes           | x           | x               | x                       |               |
| rs11605348  | Yes           | x           | x               | x                       |               |
| rs116466468 | Yes           | x           | x               | x                       |               |
| rs11650304  | Yes           | x           | x               | x                       | rs77563750    |
| rs1167132   | Yes           | x           | x               | x                       |               |
| rs11679943  | Yes           | x           | x               | x                       |               |
| rs11722569  | Yes           | x           | x               | x                       |               |
| rs11756035  | Yes           | x           | x               | x                       |               |
| rs117630493 | Yes           | x           | x               | x                       |               |
| rs11803128  | Yes           | x           | x               | x                       |               |
| rs118166957 | Yes           | x           | x               | x                       |               |
| rs11838830  | Yes           | x           | x               | x                       |               |
| rs12030482  | Yes           | x           | x               | x                       | rs17115350    |
| rs12187443  | Yes           | x           | x               | x                       |               |
| rs12251016  | Yes           | x           | x               | x                       | rs10828247    |
| rs12310246  | Yes           | x           | x               | x                       |               |
| rs12454003  | Yes           | x           | x               | x                       | rs12458369    |
| rs12520974  | Yes           | x           | x               | x                       |               |
| rs12540241  | Yes           | x           | x               | x                       |               |
| rs12605642  | Yes           | x           | x               | x                       |               |

|             |     |   |     |   |             |
|-------------|-----|---|-----|---|-------------|
| rs12614369  | Yes | x | x   | x |             |
| rs1264419   | Yes | x | x   | x | rs1264421   |
| rs12666306  | Yes | x | x   | x |             |
| rs12790660  | Yes | x | x   | x |             |
| rs1289939   | Yes | x | x   | x |             |
| rs12912299  | Yes | x | x   | x |             |
| rs12917449  | Yes | x | x   | x |             |
| rs12924275  | Yes | x | x   | x |             |
| rs12983032  | Yes | x | x   | x |             |
| rs12991815  | Yes | x | x   | x | rs6747972   |
| rs13010288  | Yes | x | x   | x |             |
| rs13135092  | Yes | x | Yes | x |             |
| rs13138995  | Yes | x | x   | x |             |
| rs1357685   | Yes | x | x   | x |             |
| rs138014720 | Yes | x | x   | x | rs138916547 |
| rs138678612 | Yes | x | x   | x |             |
| rs1519102   | Yes | x | x   | x | rs2049019   |
| rs152555    | Yes | x | x   | x |             |
| rs1530938   | Yes | x | x   | x |             |
| rs1536053   | Yes | x | x   | x |             |
| rs1553754   | Yes | x | x   | x |             |
| rs1567084   | Yes | x | x   | x |             |
| rs1580173   | Yes | x | x   | x |             |
| rs1620977   | Yes | x | x   | x |             |
| rs16903122  | Yes | x | x   | x |             |
| rs16990210  | Yes | x | x   | x |             |
| rs17005118  | Yes | x | x   | x |             |
| rs17025198  | Yes | x | x   | x |             |
| rs17083297  | Yes | x | x   | x |             |
| rs17223714  | Yes | x | x   | x |             |
| rs1731951   | Yes | x | x   | x | rs1731947   |
| rs17324524  | Yes | x | x   | x |             |
| rs17367725  | Yes | x | x   | x |             |
| rs17520265  | Yes | x | x   | x |             |
| rs17643634  | Yes | x | x   | x |             |
| rs176644    | Yes | x | x   | x |             |
| rs1861412   | Yes | x | x   | x |             |
| rs190073    | Yes | x | x   | x |             |
| rs1927902   | Yes | x | x   | x |             |
| rs1937447   | Yes | x | x   | x |             |
| rs2030672   | Yes | x | x   | x |             |
| rs2089358   | Yes | x | x   | x |             |
| rs214934    | Yes | x | x   | x | rs214932    |
| rs2216427   | Yes | x | x   | x | rs2543163   |
| rs2221119   | Yes | x | x   | x | rs1391954   |
| rs224029    | Yes | x | x   | x |             |
| rs2286729   | Yes | x | x   | x |             |
| rs2364921   | Yes | x | x   | x |             |
| rs238869    | Yes | x | x   | x |             |
| rs2388840   | Yes | x | x   | x |             |

|            |     |     |   |   |             |
|------------|-----|-----|---|---|-------------|
| rs2389631  | Yes | x   | x | x |             |
| rs2398144  | Yes | x   | x | x |             |
| rs2431108  | Yes | x   | x | x |             |
| rs2447094  | Yes | x   | x | x |             |
| rs2491124  | Yes | x   | x | x |             |
| rs2598293  | Yes | x   | x | x |             |
| rs2737240  | Yes | x   | x | x |             |
| rs2792990  | Yes | x   | x | x | rs2596692   |
| rs2815757  | Yes | x   | x | x |             |
| rs2838787  | Yes | x   | x | x |             |
| rs28552587 | Yes | x   | x | x |             |
| rs28582096 | Yes | x   | x | x |             |
| rs28611339 | Yes | x   | x | x |             |
| rs2867690  | Yes | x   | x | x |             |
| rs2903385  | Yes | x   | x | x |             |
| rs3131638  | Yes | x   | x | x |             |
| rs314281   | Yes | x   | x | x |             |
| rs3184470  | Yes | x   | x | x |             |
| rs324017   | Yes | Yes | x | x |             |
| rs34036083 | Yes | x   | x | x |             |
| rs34214423 | Yes | x   | x | x |             |
| rs34490907 | Yes | x   | x | x | rs191981826 |
| rs34967082 | Yes | x   | x | x |             |
| rs35110063 | Yes | x   | x | x |             |
| rs35322724 | Yes | x   | x | x |             |
| rs35539975 | Yes | x   | x | x |             |
| rs37445    | Yes | x   | x | x |             |
| rs3774751  | Yes | x   | x | x |             |
| rs3902952  | Yes | x   | x | x |             |
| rs4090240  | Yes | x   | x | x |             |
| rs4238755  | Yes | x   | x | x |             |
| rs4260410  | Yes | x   | x | x |             |
| rs429358   | Yes | x   | x | x |             |
| rs4502882  | Yes | x   | x | x |             |
| rs45453598 | Yes | x   | x | x |             |
| rs4588900  | Yes | x   | x | x |             |
| rs4592425  | Yes | x   | x | x |             |
| rs4643373  | Yes | x   | x | x |             |
| rs4664299  | Yes | x   | x | x |             |
| rs4699157  | Yes | x   | x | x |             |
| rs4702     | Yes | x   | x | x |             |
| rs4709655  | Yes | x   | x | x |             |
| rs4767645  | Yes | x   | x | x |             |
| rs4788203  | Yes | x   | x | x |             |
| rs4790076  | Yes | x   | x | x |             |
| rs4858708  | Yes | x   | x | x | rs1604010   |
| rs492858   | Yes | x   | x | x |             |
| rs4981170  | Yes | x   | x | x |             |
| rs521484   | Yes | x   | x | x |             |
| rs524859   | Yes | x   | x | x |             |

|            |     |     |   |   |            |
|------------|-----|-----|---|---|------------|
| rs55772859 | Yes | x   | x | x |            |
| rs55972276 | Yes | x   | x | x |            |
| rs56097173 | Yes | x   | x | x |            |
| rs56133505 | Yes | x   | x | x |            |
| rs566673   | Yes | x   | x | x |            |
| rs5877     | Yes | x   | x | x |            |
| rs6019663  | Yes | x   | x | x |            |
| rs60565673 | Yes | x   | x | x |            |
| rs6119267  | Yes | x   | x | x | rs6058750  |
| rs61765555 | Yes | x   | x | x |            |
| rs61921611 | Yes | x   | x | x |            |
| rs62068188 | Yes | x   | x | x |            |
| rs62149809 | Yes | x   | x | x |            |
| rs62158170 | Yes | Yes | x | x |            |
| rs62194948 | Yes | x   | x | x | rs62194947 |
| rs62213452 | Yes | x   | x | x |            |
| rs62264767 | Yes | x   | x | x |            |
| rs62301574 | Yes | x   | x | x | rs12510345 |
| rs623025   | Yes | x   | x | x |            |
| rs62383308 | Yes | x   | x | x |            |
| rs62429521 | Yes | x   | x | x |            |
| rs62590551 | Yes | x   | x | x |            |
| rs6457796  | Yes | x   | x | x |            |
| rs6465151  | Yes | x   | x | x |            |
| rs647905   | Yes | x   | x | x |            |
| rs6510033  | Yes | x   | x | x |            |
| rs6545798  | Yes | x   | x | x | rs9808396  |
| rs6562066  | Yes | x   | x | x |            |
| rs6589988  | Yes | x   | x | x |            |
| rs6597649  | Yes | x   | x | x |            |
| rs6601080  | Yes | x   | x | x |            |
| rs6606731  | Yes | x   | x | x | rs7974321  |
| rs66674044 | Yes | x   | x | x | rs72771023 |
| rs667730   | Yes | x   | x | x |            |
| rs6702604  | Yes | x   | x | x |            |
| rs670501   | Yes | x   | x | x |            |
| rs671985   | Yes | x   | x | x |            |
| rs6734957  | Yes | x   | x | x |            |
| rs67501351 | Yes | x   | x | x | rs1902812  |
| rs6756610  | Yes | x   | x | x | rs62167789 |
| rs6808140  | Yes | x   | x | x |            |
| rs6888135  | Yes | x   | x | x |            |
| rs694786   | Yes | x   | x | x |            |
| rs6967168  | Yes | x   | x | x |            |
| rs6973090  | Yes | x   | x | x |            |
| rs6978112  | Yes | x   | x | x |            |
| rs699844   | Yes | x   | x | x |            |
| rs701394   | Yes | x   | x | x |            |
| rs7040224  | Yes | x   | x | x |            |
| rs7044885  | Yes | x   | x | x | rs11138085 |

|            |     |   |     |   |             |
|------------|-----|---|-----|---|-------------|
| rs715338   | Yes | x | x   | x |             |
| rs71575448 | Yes | x | x   | x |             |
| rs7168238  | Yes | x | x   | x | rs11853747  |
| rs7214267  | Yes | x | x   | x |             |
| rs72657797 | Yes | x | x   | x |             |
| rs72773790 | Yes | x | x   | x |             |
| rs728017   | Yes | x | x   | x |             |
| rs72820274 | Yes | x | x   | x |             |
| rs72899452 | Yes | x | x   | x |             |
| rs73079014 | Yes | x | x   | x |             |
| rs73163783 | Yes | x | x   | x |             |
| rs73671843 | Yes | x | x   | x |             |
| rs7402939  | Yes | x | x   | x |             |
| rs742760   | Yes | x | x   | x | rs35388084  |
| rs7432782  | Yes | x | x   | x |             |
| rs7475916  | Yes | x | x   | x | rs10824352  |
| rs7486418  | Yes | x | x   | x |             |
| rs75452188 | Yes | x | x   | x |             |
| rs7566062  | Yes | x | x   | x |             |
| rs7571486  | Yes | x | x   | x |             |
| rs75932578 | Yes | x | x   | x |             |
| rs7599697  | Yes | x | x   | x |             |
| rs76145129 | Yes | x | x   | x |             |
| rs7615602  | Yes | x | x   | x | rs9838564   |
| rs7625896  | Yes | x | x   | x |             |
| rs77641763 | Yes | x | x   | x |             |
| rs78206187 | Yes | x | x   | x |             |
| rs79204944 | Yes | x | x   | x |             |
| rs79693059 | Yes | x | x   | x | rs117465572 |
| rs7992992  | Yes | x | x   | x |             |
| rs8076183  | Yes | x | x   | x |             |
| rs8180457  | Yes | x | x   | x |             |
| rs8180817  | Yes | x | x   | x | rs10228494  |
| rs8181889  | Yes | x | x   | x |             |
| rs823247   | Yes | x | x   | x |             |
| rs830716   | Yes | x | x   | x | rs1701116   |
| rs871994   | Yes | x | x   | x |             |
| rs874168   | Yes | x | x   | x |             |
| rs908668   | Yes | x | x   | x |             |
| rs910187   | Yes | x | x   | x |             |
| rs9316619  | Yes | x | x   | x |             |
| rs9373590  | Yes | x | x   | x | rs9377235   |
| rs9394502  | Yes | x | x   | x |             |
| rs940780   | Yes | x | x   | x |             |
| rs9469434  | Yes | x | x   | x |             |
| rs9527083  | Yes | x | Yes | x |             |
| rs9540729  | Yes | x | x   | x | rs7995375   |
| rs9563886  | Yes | x | x   | x |             |
| rs984306   | Yes | x | x   | x |             |
| rs9889282  | Yes | x | x   | x |             |



|             |     |     |   |     |
|-------------|-----|-----|---|-----|
| rs9931543   | Yes | x   | x | x   |
| rs9964420   | Yes | x   | x | x   |
| rs10502971  | x   | x   | x | Yes |
| rs78095640  | x   | x   | x | Yes |
| rs10179767  | x   | x   | x | Yes |
| rs62395293  | x   | x   | x | Yes |
| rs138017935 | x   | x   | x | Yes |
| rs8050806   | x   | x   | x | Yes |
| rs10765078  | x   | x   | x | Yes |
| rs9898809   | x   | x   | x | Yes |
| rs9845387   | x   | Yes | x | x   |
| rs7711696   | x   | Yes | x | x   |
| rs72826719  | x   | Yes | x | x   |
| rs6932158   | x   | Yes | x | x   |
| rs68094047  | x   | Yes | x | x   |
| rs6785034   | x   | Yes | x | x   |
| rs6664467   | x   | Yes | x | x   |
| rs6593005   | x   | Yes | x | x   |
| rs55946513  | x   | Yes | x | x   |
| rs4886860   | x   | Yes | x | x   |
| rs4886140   | x   | Yes | x | x   |
| rs4751      | x   | Yes | x | x   |
| rs4688760   | x   | Yes | x | x   |
| rs4683301   | x   | Yes | x | x   |
| rs4577309   | x   | Yes | x | x   |
| rs3824081   | x   | Yes | x | x   |
| rs35881094  | x   | Yes | x | x   |
| rs314280    | x   | Yes | x | x   |
| rs3104778   | x   | Yes | x | x   |
| rs302165    | x   | Yes | x | x   |
| rs2956278   | x   | Yes | x | x   |
| rs28061     | x   | Yes | x | x   |
| rs2644128   | x   | Yes | x | x   |
| rs2613503   | x   | Yes | x | x   |
| rs2296580   | x   | Yes | x | x   |
| rs2192338   | x   | Yes | x | x   |
| rs2147141   | x   | Yes | x | x   |
| rs2062113   | x   | Yes | x | x   |
| rs1942262   | x   | Yes | x | x   |
| rs1923770   | x   | Yes | x | x   |
| rs1841625   | x   | Yes | x | x   |
| rs17669584  | x   | Yes | x | x   |
| rs17151854  | x   | Yes | x | x   |
| rs17139246  | x   | Yes | x | x   |
| rs1592757   | x   | Yes | x | x   |
| rs1544637   | x   | Yes | x | x   |
| rs1430205   | x   | Yes | x | x   |
| rs12713372  | x   | Yes | x | x   |
| rs12405761  | x   | Yes | x | x   |
| rs11804386  | x   | Yes | x | x   |

|            |   |     |     |   |
|------------|---|-----|-----|---|
| rs11793831 | x | Yes | x   | x |
| rs11793074 | x | Yes | x   | x |
| rs11673344 | x | Yes | x   | x |
| rs11651809 | x | Yes | x   | x |
| rs11635495 | x | Yes | x   | x |
| rs11191595 | x | Yes | x   | x |
| rs11184946 | x | Yes | x   | x |
| rs11097861 | x | Yes | x   | x |
| rs10838708 | x | Yes | x   | x |
| rs10280045 | x | Yes | x   | x |
| rs10156602 | x | Yes | x   | x |
| rs10888692 | x | x   | Yes | x |
| rs35311109 | x | x   | Yes | x |
| rs197422   | x | x   | Yes | x |
| rs12033257 | x | x   | Yes | x |
| rs59898460 | x | x   | Yes | x |
| rs12071912 | x | x   | Yes | x |
| rs12058508 | x | x   | Yes | x |
| rs4852567  | x | x   | Yes | x |
| rs35713889 | x | x   | Yes | x |
| rs7628207  | x | x   | Yes | x |
| rs62260755 | x | x   | Yes | x |
| rs9831967  | x | x   | Yes | x |
| rs28428925 | x | x   | Yes | x |
| rs638293   | x | x   | Yes | x |
| rs6770476  | x | x   | Yes | x |
| rs34811474 | x | x   | Yes | x |
| rs17199964 | x | x   | Yes | x |
| rs34592089 | x | x   | Yes | x |
| rs13136239 | x | x   | Yes | x |
| rs6869446  | x | x   | Yes | x |
| rs1363103  | x | x   | Yes | x |
| rs40465    | x | x   | Yes | x |
| rs1976423  | x | x   | Yes | x |
| rs17474406 | x | x   | Yes | x |
| rs1946247  | x | x   | Yes | x |
| rs4713656  | x | x   | Yes | x |
| rs6915136  | x | x   | Yes | x |
| rs482786   | x | x   | Yes | x |
| rs4713675  | x | x   | Yes | x |
| rs3828783  | x | x   | Yes | x |
| rs767896   | x | x   | Yes | x |
| rs11751591 | x | x   | Yes | x |
| rs17600945 | x | x   | Yes | x |
| rs205262   | x | x   | Yes | x |
| rs6907508  | x | x   | Yes | x |
| rs79834165 | x | x   | Yes | x |
| rs33959228 | x | x   | Yes | x |
| rs6926377  | x | x   | Yes | x |
| rs10259354 | x | x   | Yes | x |

|                 |   |   |     |   |
|-----------------|---|---|-----|---|
| rs7798894       | x | x | Yes | x |
| rs6966540       | x | x | Yes | x |
| rs10156143      | x | x | Yes | x |
| rs2396719       | x | x | Yes | x |
| rs12537376      | x | x | Yes | x |
| rs1859100       | x | x | Yes | x |
| rs11786084      | x | x | Yes | x |
| rs7870079       | x | x | Yes | x |
| rs10992729      | x | x | Yes | x |
| rs10821169      | x | x | Yes | x |
| rs6478241       | x | x | Yes | x |
| 9:140241209_C_T | x | x | Yes | x |
| 9:140249826_C_T | x | x | Yes | x |
| 9:140251458_G_A | x | x | Yes | x |
| rs2183271       | x | x | Yes | x |
| rs11599236      | x | x | Yes | x |
| rs12765185      | x | x | Yes | x |
| rs61883178      | x | x | Yes | x |
| rs7109139       | x | x | Yes | x |
| rs2759694       | x | x | Yes | x |
| rs6561715       | x | x | Yes | x |
| rs1443914       | x | x | Yes | x |
| rs7987501       | x | x | Yes | x |
| rs12435797      | x | x | Yes | x |
| rs2006281       | x | x | Yes | x |
| rs2386584       | x | x | Yes | x |
| rs285026        | x | x | Yes | x |
| rs11871043      | x | x | Yes | x |
| rs11079993      | x | x | Yes | x |
| rs35938312      | x | x | Yes | x |
| rs62099231      | x | x | Yes | x |
| rs62098013      | x | x | Yes | x |
| rs7226995       | x | x | Yes | x |
| rs10164055      | x | x | Yes | x |
| rs2424248       | x | x | Yes | x |

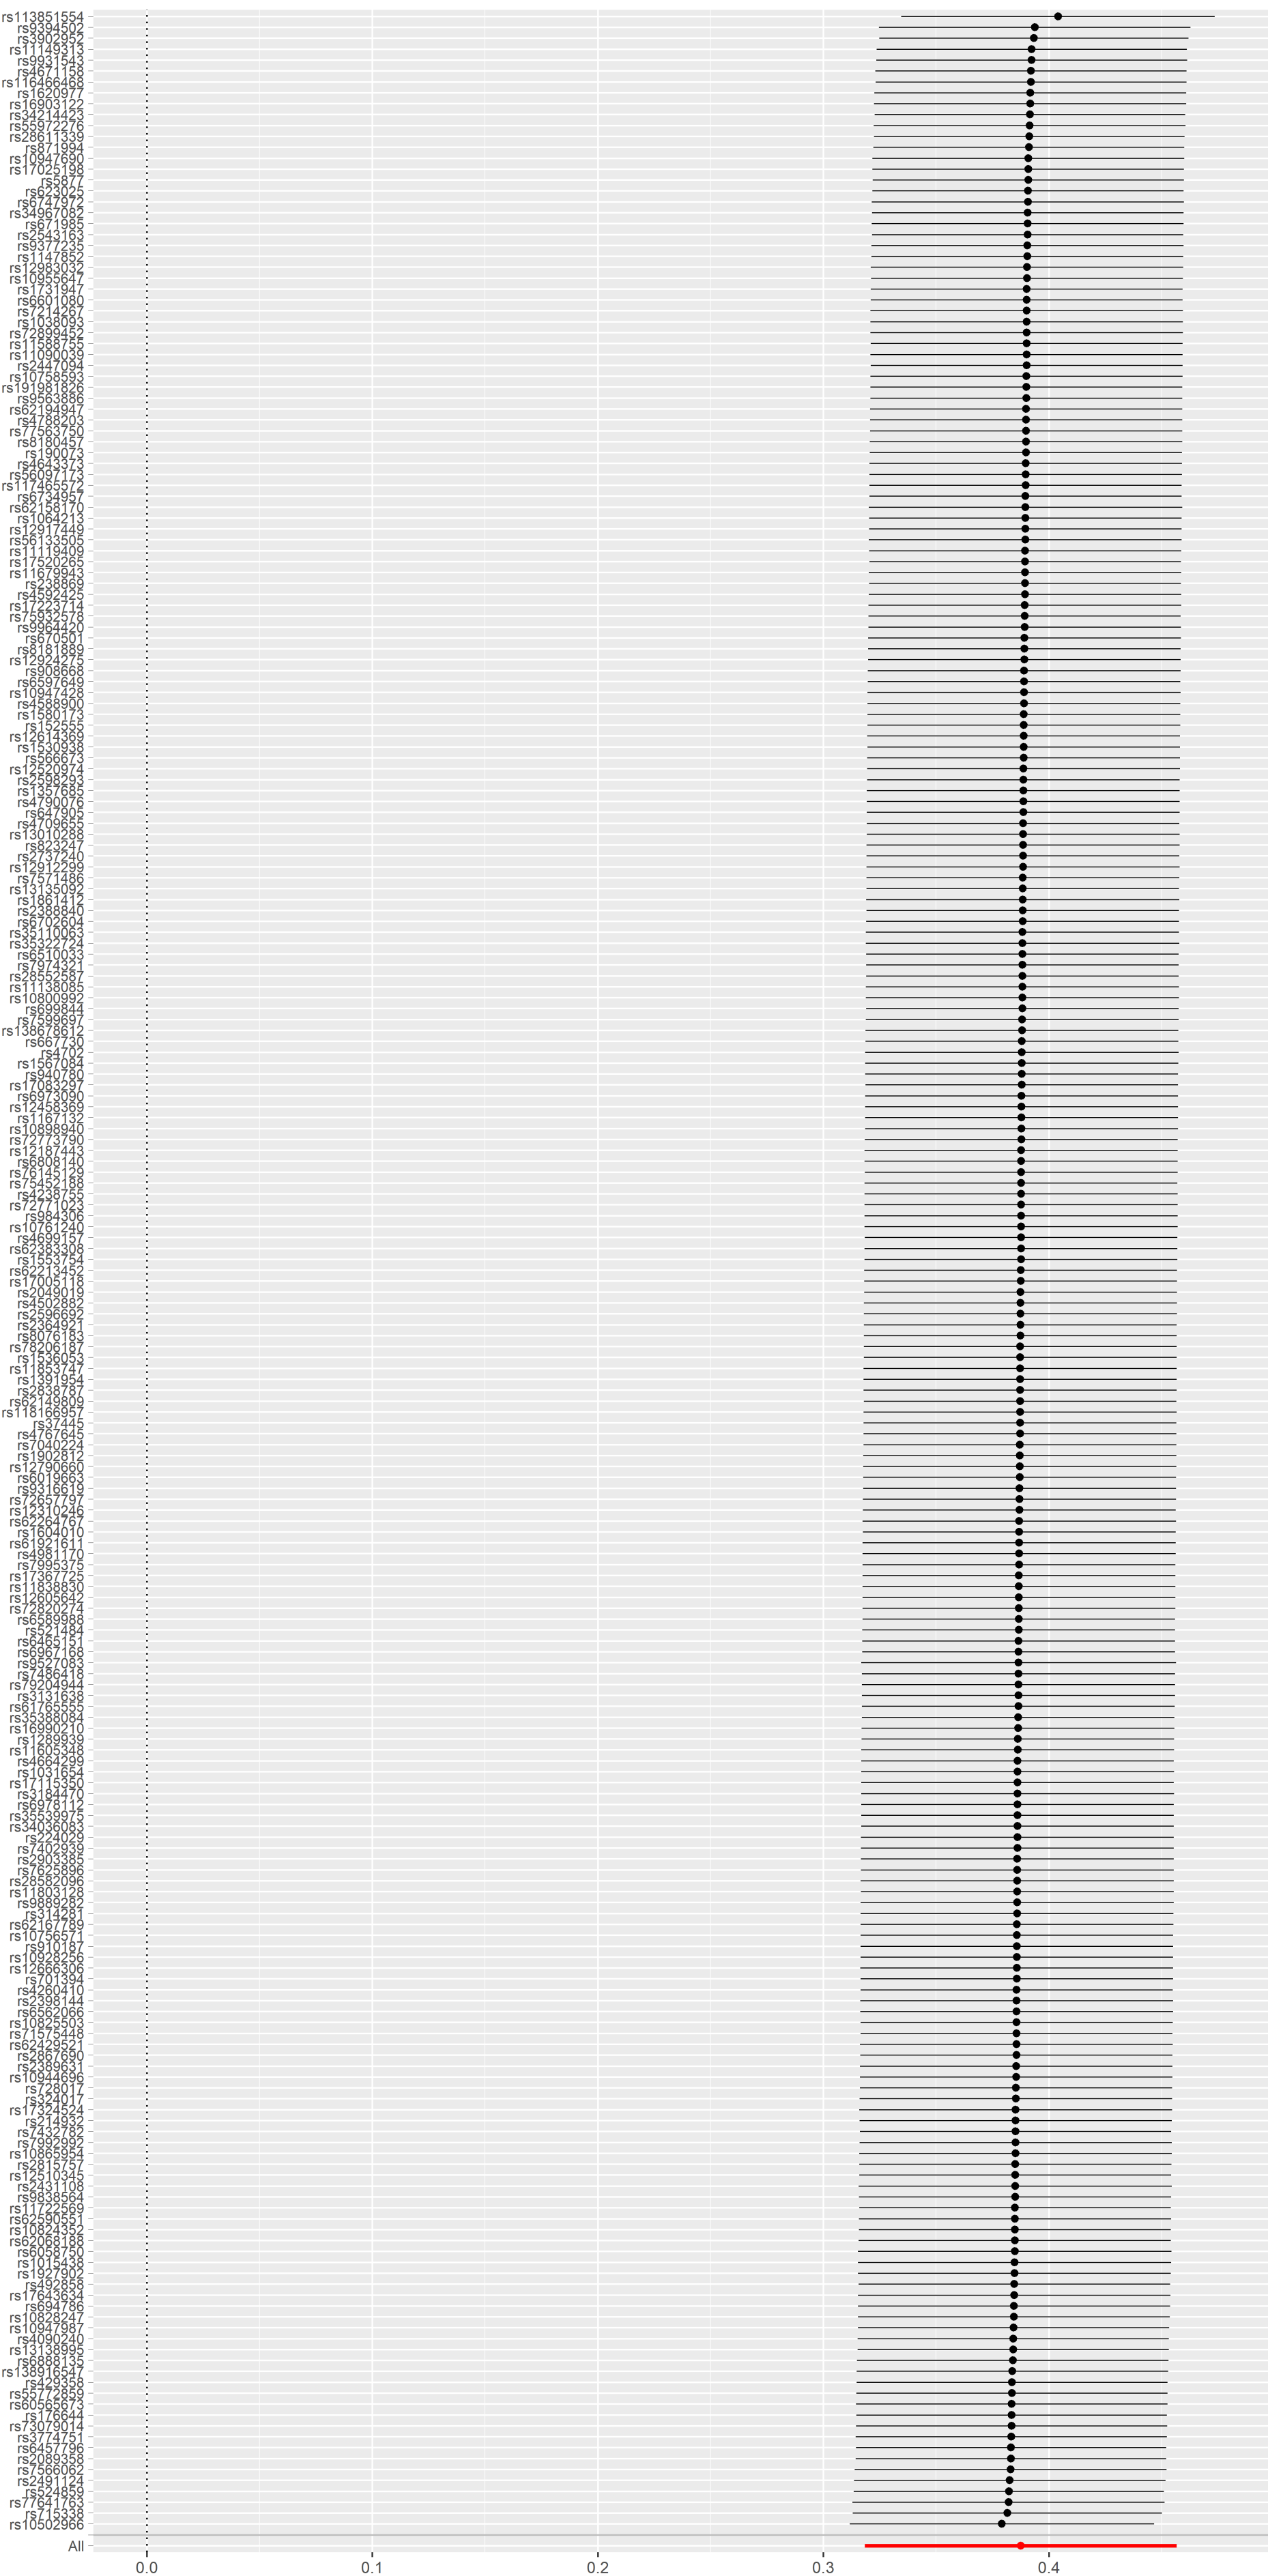

**Supplementary Figure 1. Jansen et al. insomnia instruments have positive effect size on pain outcome.**  
 A leave-one-out plot of the IVW effects of the Jansen et al. insomnia exposure instruments on the general pain outcome analysis.

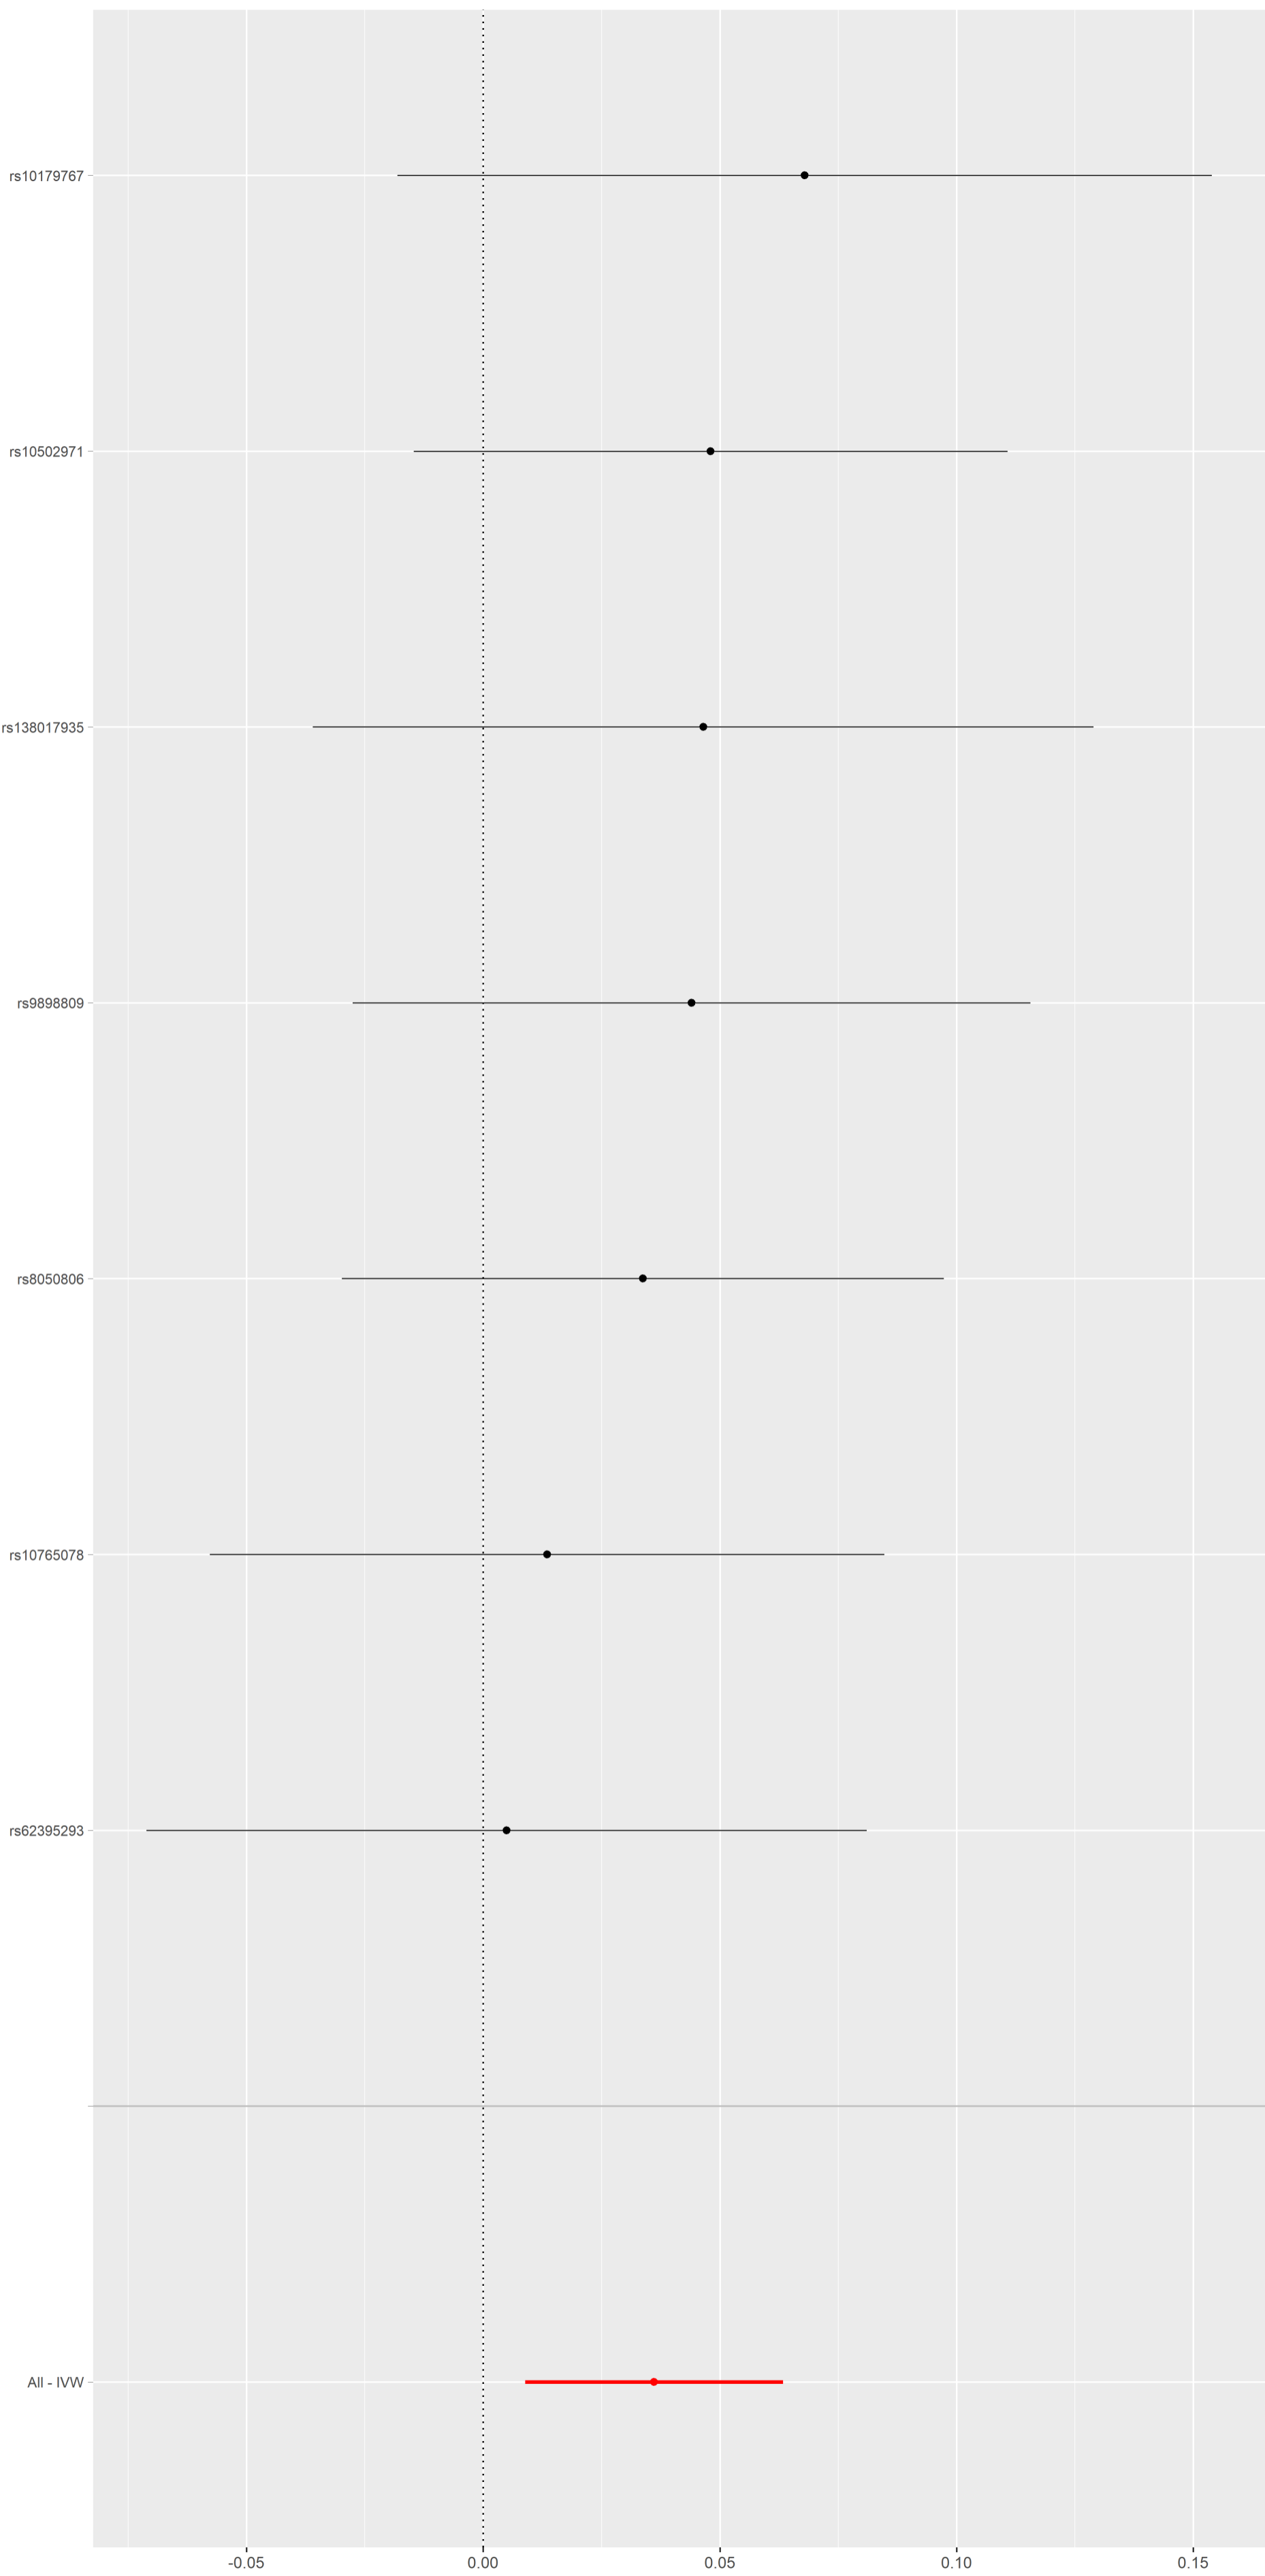

**Supplementary Figure 2. FinnGen pain demonstrates a significant positive effect size on Lane UKBB outcome.** Forest plot of the MR-based effect sizes of FinnGen pain exposure instruments on Lane et al. insomnia outcome.

MR Method

Inverse variance weighted

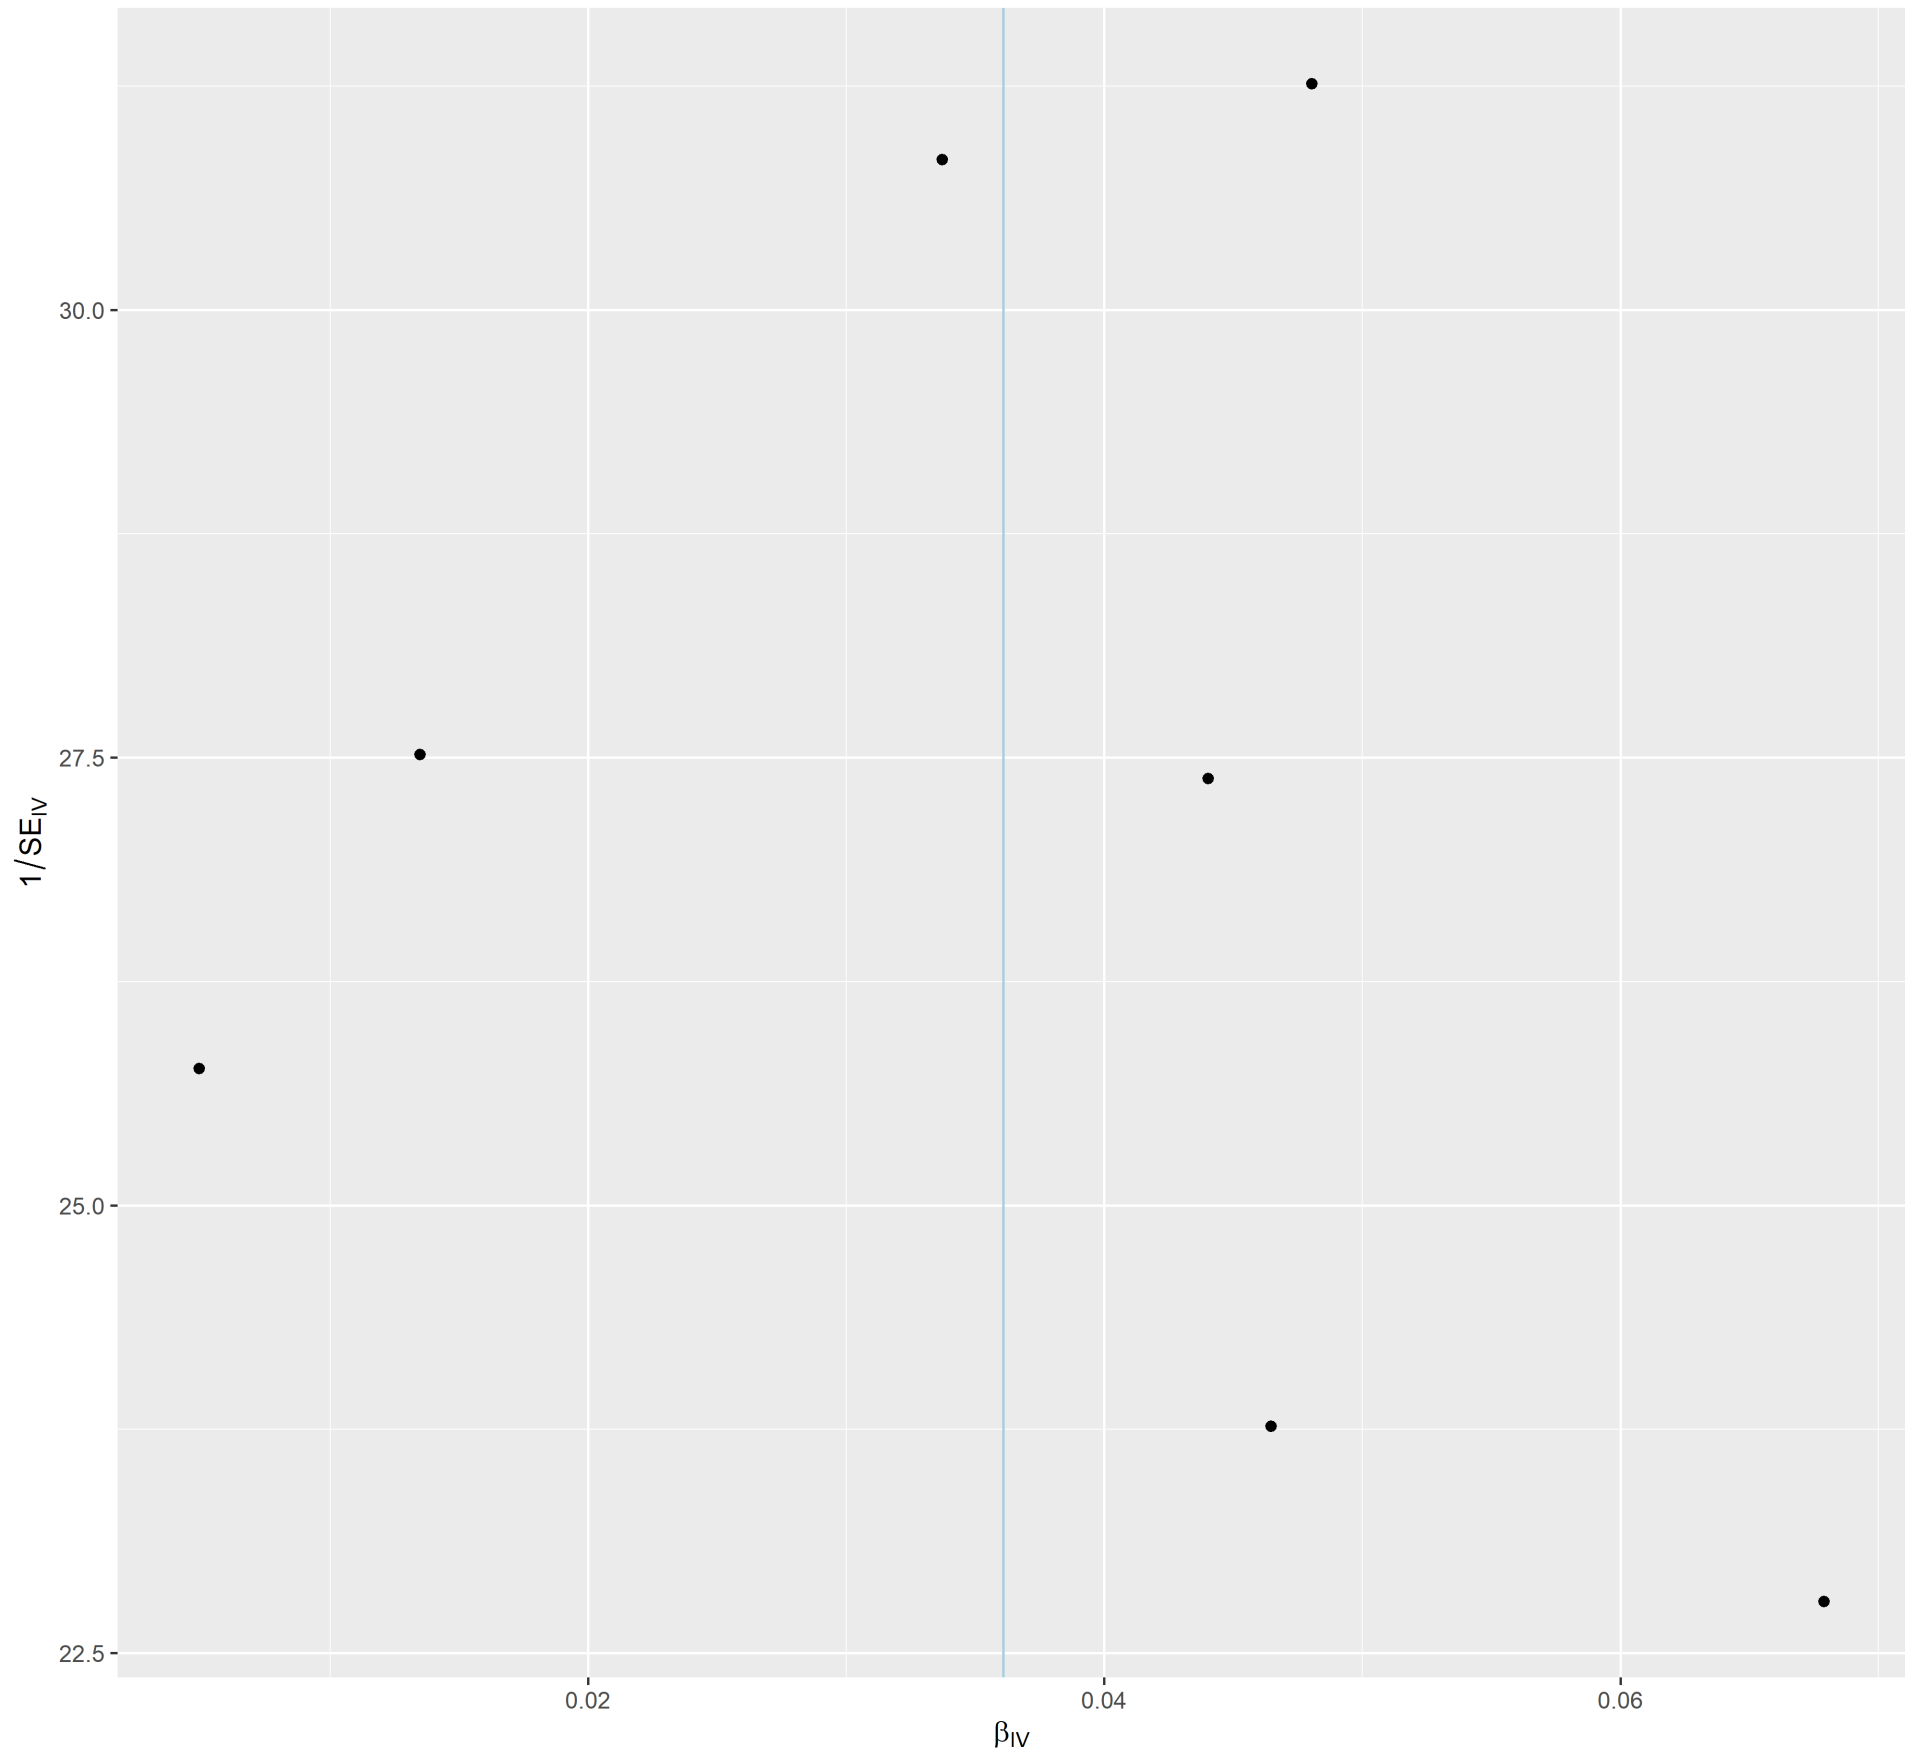

**Supplementary Figure 3. General pain instruments show no significant pleiotropy or experimental bias.** A funnel plot of the IVW analysis for FinnGen general pain instruments as exposure on Lane et al. insomnia outcome.

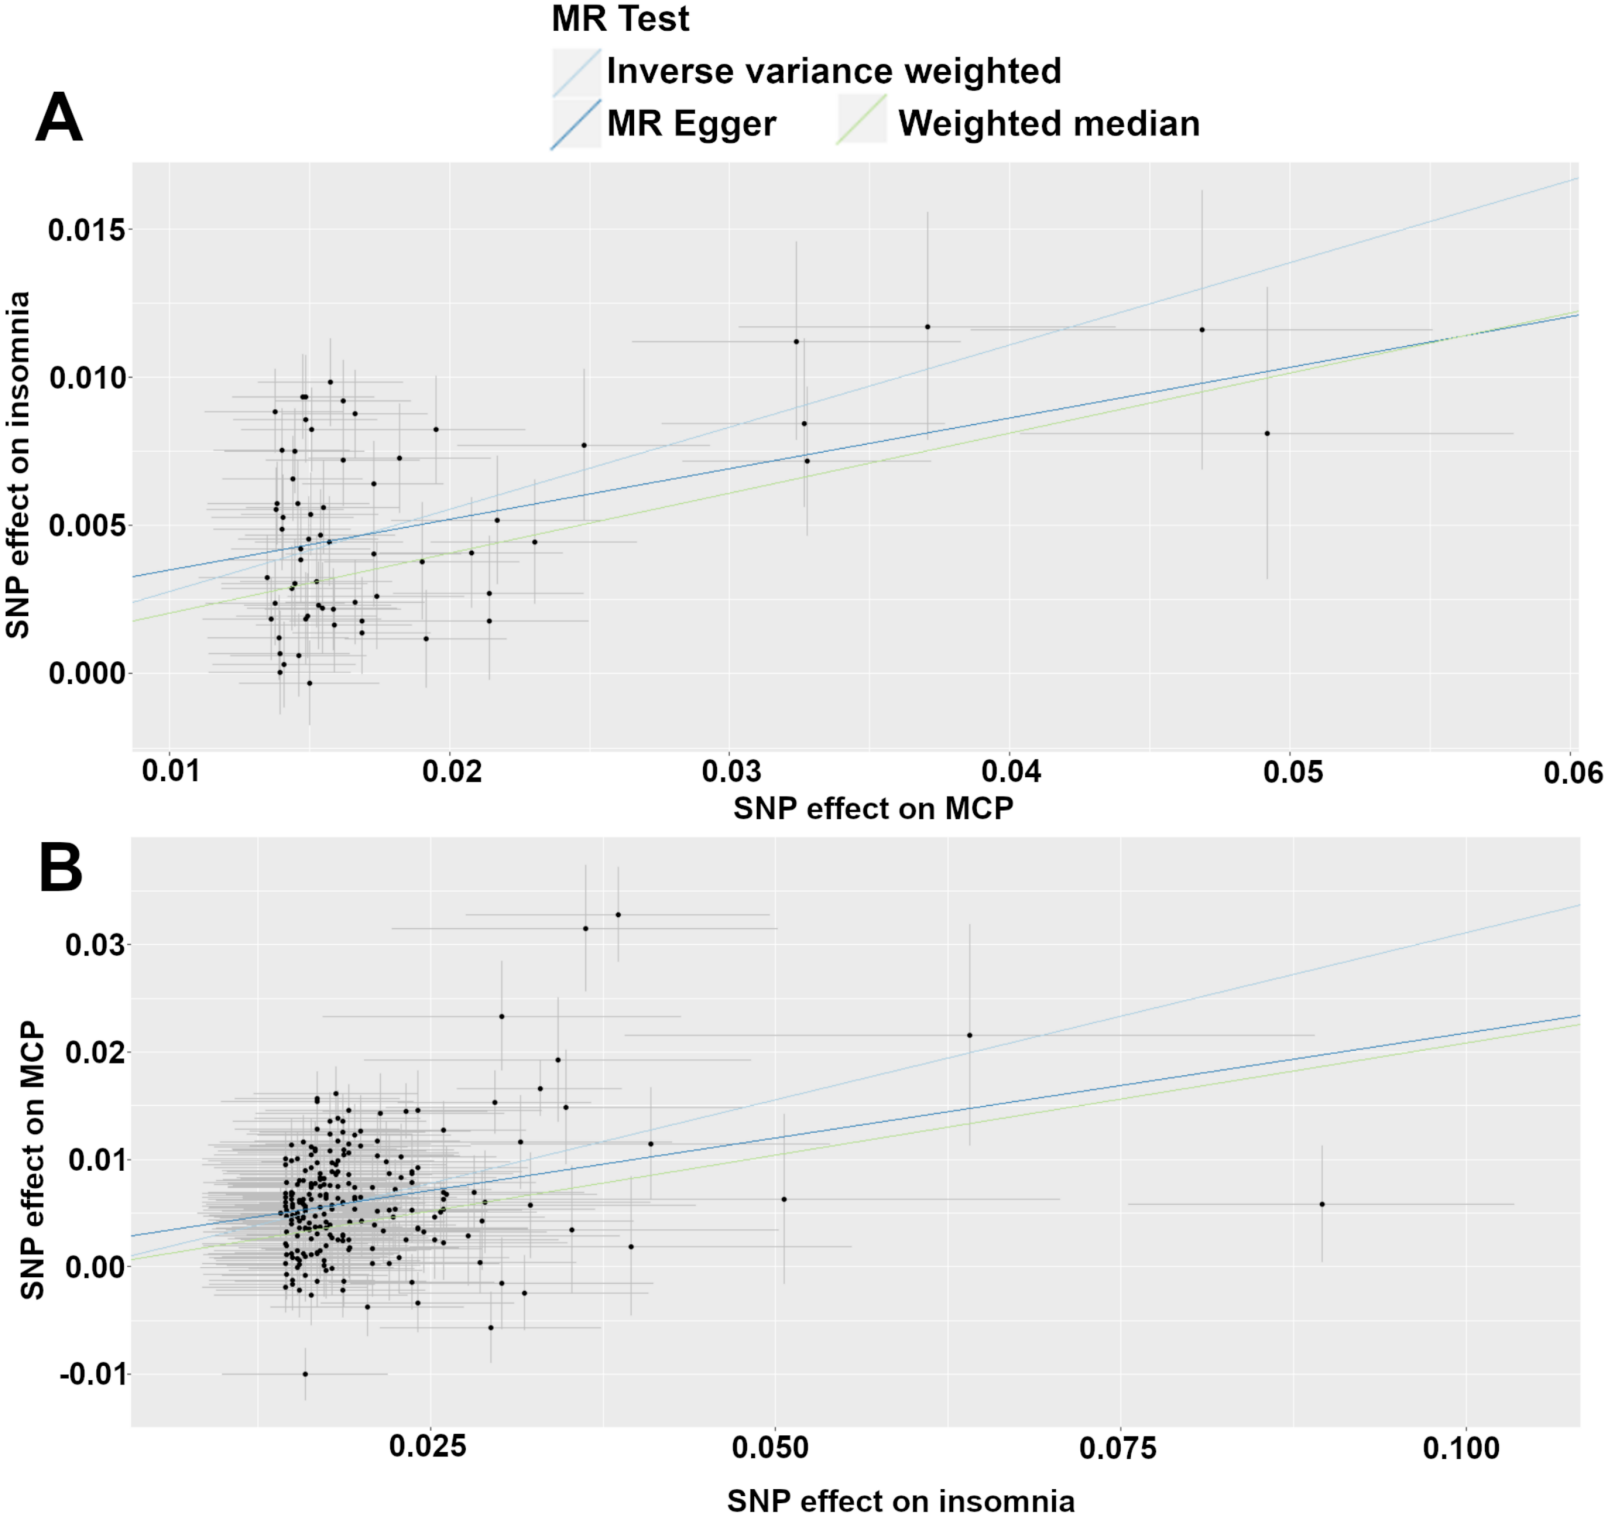

**Supplementary Figure 4. MCP-insomnia MR analysis shows similar effects as FinnGen general pain-insomnia.** Combined MR Egger, weighted median and IVW scatter plots of Johnston et al. MCP lead SNPs as exposure and Lane et al. insomnia summary statistics as outcome (A), and Jansen et al. insomnia lead SNPs as exposure for an MCP outcome (B).

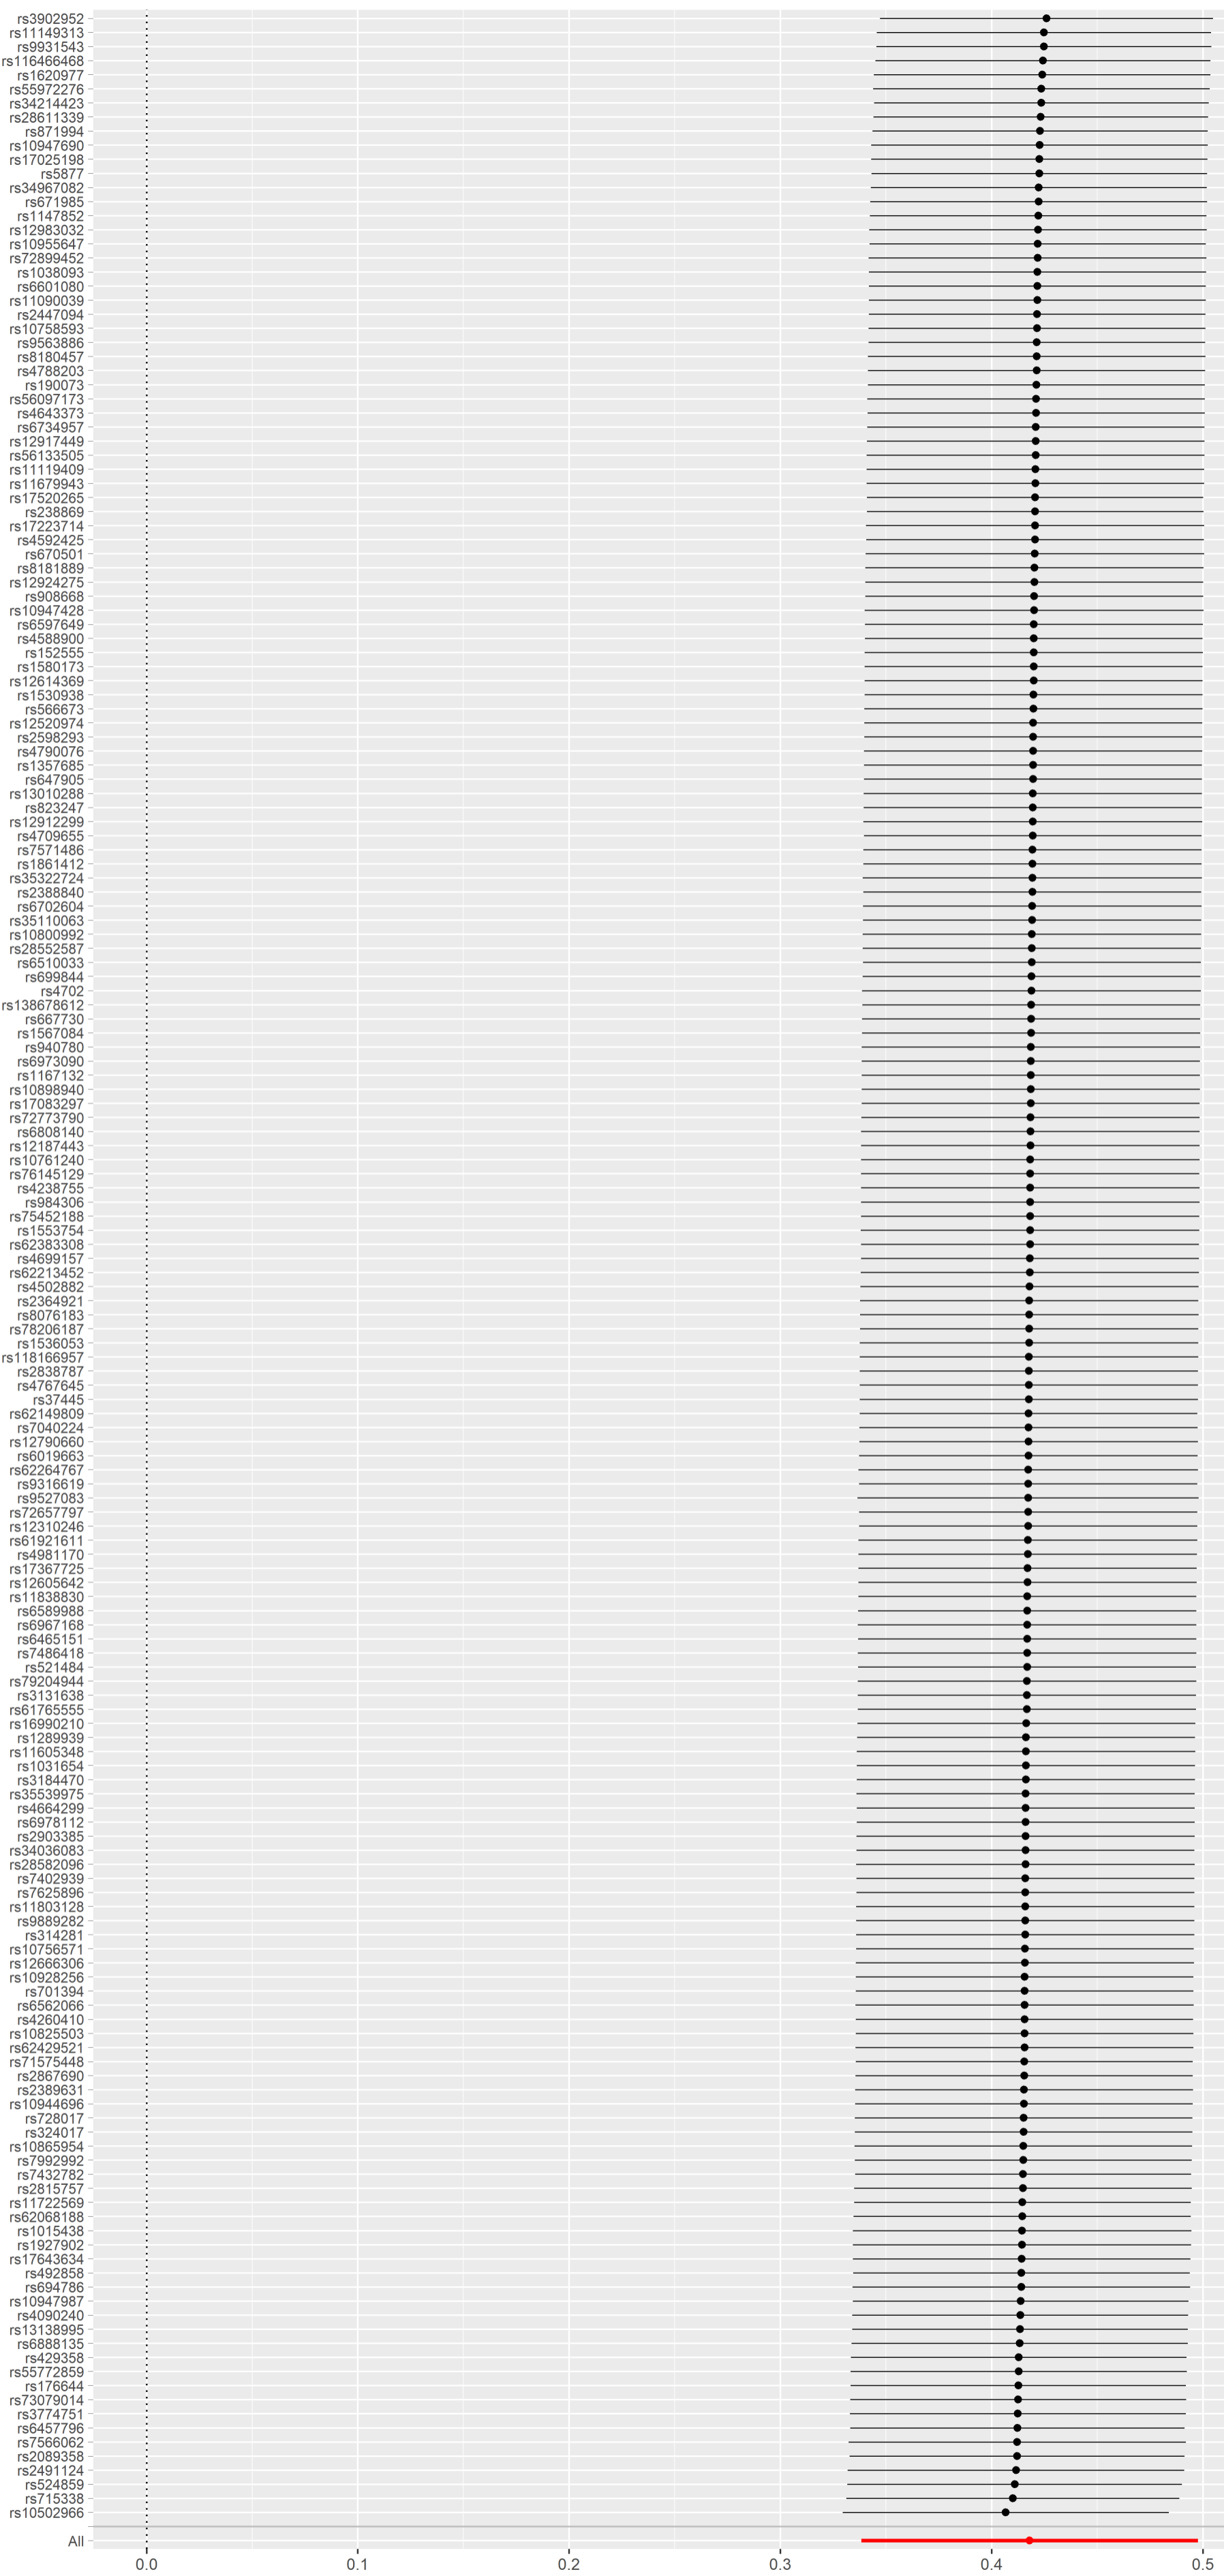

**Supplementary Figure 5. Filtered Jansen et al. insomnia instruments have positive effect size on pain outcome.**  
 A leave-one-out plot of the IVW effects of the Jansen et al. insomnia exposure instruments not significantly associated to other UKBB sleep trait analyses on general pain as outcome.
